# Supplementary material for: Inequalities in the evolution of the COVID-19 pandemic: an ecological study of inequalities in mortality in the first wave and the effects of the first national lockdown in England
Source: PubMed Central journal article supplement — BMJ Open. 2022 Aug 10;12(8):e058658. doi: 10.1136/bmjopen-2021-058658 (PMC9378950; doi:10.1136/bmjopen-2021-058658), 2022-08-10
Supplement: bmjopen-2021-058658.draft_revisions.pdf [file bmjopen-2021-058658.draft_revisions.pdf]

# BMJ Open

BMJ Open is committed to open peer review. As part of this commitment we make the peer review history of every article we publish publicly available.

When an article is published we post the peer reviewers' comments and the authors' responses online. We also post the versions of the paper that were used during peer review. These are the versions that the peer review comments apply to.

The versions of the paper that follow are the versions that were submitted during the peer review process. They are not the versions of record or the final published versions. They should not be cited or distributed as the published version of this manuscript.

BMJ Open is an open access journal and the full, final, typeset and author-corrected version of record of the manuscript is available on our site with no access controls, subscription charges or pay-per-view fees (<http://bmjopen.bmj.com>).

If you have any questions on BMJ Open's open peer review process please email [info.bmjopen@bmj.com](mailto:info.bmjopen@bmj.com)

# BMJ Open

## **Geographical inequalities in the evolution of the COVID-19 pandemic: An ecological study of inequalities in mortality in the first wave and the effects of the first national lockdown in England**

|                               |                                                                                                                                                                                                                                |
|-------------------------------|--------------------------------------------------------------------------------------------------------------------------------------------------------------------------------------------------------------------------------|
| Journal:                      | <i>BMJ Open</i>                                                                                                                                                                                                                |
| Manuscript ID                 | bmjopen-2021-058658                                                                                                                                                                                                            |
| Article Type:                 | Original research                                                                                                                                                                                                              |
| Date Submitted by the Author: | 23-Oct-2021                                                                                                                                                                                                                    |
| Complete List of Authors:     | Welsh, Claire; Newcastle University<br>Albani, Viviana; Newcastle University<br>Matthews, Fiona; Newcastle University Faculty of Medical Sciences, Population Health Sciences Institute<br>Bambra, Clare; Newcastle University |
| Keywords:                     | COVID-19, Epidemiology < INFECTIOUS DISEASES, Public health < INFECTIOUS DISEASES                                                                                                                                              |
|                               |                                                                                                                                                                                                                                |

SCHOLARONE™  
Manuscripts

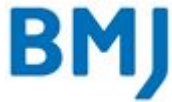

I, the Submitting Author has the right to grant and does grant on behalf of all authors of the Work (as defined in the below author licence), an exclusive licence and/or a non-exclusive licence for contributions from authors who are: i) UK Crown employees; ii) where BMJ has agreed a CC-BY licence shall apply, and/or iii) in accordance with the terms applicable for US Federal Government officers or employees acting as part of their official duties; on a worldwide, perpetual, irrevocable, royalty-free basis to BMJ Publishing Group Ltd ("BMJ") its licensees and where the relevant Journal is co-owned by BMJ to the co-owners of the Journal, to publish the Work in this journal and any other BMJ products and to exploit all rights, as set out in our [licence](#).

The Submitting Author accepts and understands that any supply made under these terms is made by BMJ to the Submitting Author unless you are acting as an employee on behalf of your employer or a postgraduate student of an affiliated institution which is paying any applicable article publishing charge ("APC") for Open Access articles. Where the Submitting Author wishes to make the Work available on an Open Access basis (and intends to pay the relevant APC), the terms of reuse of such Open Access shall be governed by a Creative Commons licence – details of these licences and which [Creative Commons](#) licence will apply to this Work are set out in our licence referred to above.

Other than as permitted in any relevant BMJ Author's Self Archiving Policies, I confirm this Work has not been accepted for publication elsewhere, is not being considered for publication elsewhere and does not duplicate material already published. I confirm all authors consent to publication of this Work and authorise the granting of this licence.

1  
2  
3 **1 Geographical inequalities in the evolution of the COVID-19 pandemic: An ecological study of**  
4 **2 inequalities in mortality in the first wave and the effects of the first national lockdown in England**

5  
6  
7  
8  
9  
10 **4 Claire E. Welsh PhD (0000-0001-9477-0775)<sup>1\*</sup>, Viviana Albani (0000-0001-9584-7631)<sup>1</sup>, Fiona E.**  
11  
12 **5 Matthews PhD (0000-0002-1728-2388)<sup>1,2</sup>, Clare Bamba PhD (0000-0002-1294-6851)<sup>1,2</sup>**  
13  
14  
15  
16  
17

18 <sup>1</sup>Population Health Sciences Institute, Newcastle University, UK, NE4 5PL

19  
20 <sup>2</sup> Applied Research Collaboration North East and North Cumbria, Newcastle University, UK, NE4 5PL  
21  
22  
23  
24  
25

26 \*Corresponding author: [Claire.Welsh@newcastle.ac.uk](mailto:Claire.Welsh@newcastle.ac.uk), Room 2.38 Biomedical Research Building,  
27  
28  
29  
30  
31  
32  
33  
34  
35  
36  
37  
38  
39  
40  
41  
42  
43  
44  
45  
46  
47  
48  
49  
50  
51  
52  
53  
54  
55  
56  
57  
58  
59  
60

11 Campus for Aging and Vitality, Newcastle University, Newcastle, NE4 5PL.

1  
2  
3 **14 Conflicts of Interest Statement**  
4

5  
6 15 All authors have completed the ICMJE uniform disclosure form at [www.icmje.org/coi\\_disclosure.pdf](http://www.icmje.org/coi_disclosure.pdf)  
7  
8 16 and declare: no financial relationships with any organisations that might have an interest in the  
9  
10 17 submitted work in the previous three years; no other relationships or activities that could appear to  
11  
12 18 have influenced the submitted work.  
13

14  
15 **19 Data Sharing Statement**  
16

17 20 All data used are publicly freely available through the ONS. Code used in the analyses is available  
18  
19 21 upon request.  
20  
21

22 **22 Ethical Approval**  
23

24 23 This study was approved by the Newcastle University Ethics Committee (Ref: 7543/2020).  
25  
26

27 **24 Transparency declaration**  
28

29  
30 25 The lead author\* affirms that this manuscript is an honest, accurate, and transparent account of the  
31  
32 26 study being reported; that no important aspects of the study have been omitted; and that any  
33  
34 27 discrepancies from the study as planned (and, if relevant, registered) have been explained.  
35  
36

37 28

38  
39  
40 29 \*The manuscript's guarantor.  
41

42  
43 30  
44

45 **31 Funding**  
46

47 32 This work was supported by a grant from The Health Foundation (Ref: 2211473), who took no part in  
48  
49 33 the design, analysis or writing of this study.  
50  
51

52 34  
53

54  
55 **35 Keywords**  
56  
57

1  
2  
3  
4  
5  
6  
7  
8  
9  
10  
11  
12  
13  
14  
15  
16  
17  
18  
19  
20  
21  
22  
23  
24  
25  
26  
27  
28  
29  
30  
31  
32  
33  
34  
35  
36  
37  
38  
39  
40  
41  
42  
43  
44  
45  
46  
47  
48  
49  
50  
51  
52  
53  
54  
55  
56  
57  
58  
59  
60

36 **COVID-19; geography; inequalities ;mortality;**

37

38

39

For peer review only

1  
2  
3 40 **Summary Box**  
4

5  
6 41 **Section 1: What is already known on this subject**  
7

8 42 There are cross-sectional estimates of geographical inequalities in the severity of the COVID-19  
9  
10 43 pandemic in England in terms of cases, hospitalisations and deaths. But these studies have not  
11  
12 44 examined the evolution of the epidemic nor the impact of the national lockdown on inequalities in  
13  
14 45 COVID-19 related mortality.  
15

16  
17 46 **Section 2: What this study adds**  
18

19  
20 47 This study provides the first analysis of inequalities in the evolution of the pandemic in different  
21  
22 48 English local authorities and the impact of the first national lock down on them. We estimate  
23  
24 49 geographical inequalities by local authority in the evolution of age-standardised COVID-19 mortality  
25  
26 50 during the first wave of the pandemic in England (January to July 2020) and the impact on these  
27  
28 51 inequalities in the cumulative death rates of the first national lockdown. We found that more  
29  
30 52 deprived local authorities started to record COVID-19 deaths earlier, and that their death rates  
31  
32 53 increased faster. Cumulative COVID-19 mortality inequalities during the first wave of the pandemic  
33  
34 54 in England were moderately reduced by first national lockdown.  
35  
36  
37  
38  
39  
40  
41  
42  
43  
44  
45  
46  
47  
48  
49  
50  
51  
52  
53  
54  
55  
56  
57  
58  
59  
60

1  
2  
3 56 **Strengths and limitations of this study**  
4

- 5  
6 57 • **This study interrogates the evolution of inequalities in COVID-19 in the first wave of the**  
7  
8 58 **pandemic in England and the impact of the national lock down.**  
9  
10 59 • **National level official (ONS) data used, covering nearly all local authorities in England and**  
11  
12 60 **including all deaths that made any mention of COVID-19 on death certificates, requiring**  
13  
14 61 **sensitive data acquisition.**  
15  
16 62 • **Age-standardised deaths rates at lower geographies are not available at the time of**  
17  
18 63 **writing but could lend extra nuance to these findings.**  
19  
20 64 • **Ecological study not using individual level data, so unable to examine the individual level**  
21  
22 65 **risks for covid-19 mortality.**  
23  
24  
25  
26

27 66  
28 67 **Abstract**  
29

30 68 **Objectives**  
31

32 69 This is the first study to examine how geographical inequalities in COVID-19 mortality rates evolved  
33  
34 70 in England, and whether the first national lockdown modified them. This analysis provides  
35  
36 71 important lessons to inform public health planning to reduce inequalities in any future pandemics.  
37  
38

39 72 **Design**  
40

41  
42 73 Longitudinal ecological study  
43  
44

45 74 **Setting**  
46

47 75 307 Lower-tier local authorities in England  
48  
49

50 76 **Primary outcome measure**  
51

52  
53 77 Age-standardised COVID-19 mortality rates by local authority and decile of index of multiple  
54  
55 78 deprivation.  
56  
57



**79 Results**

80 Local authorities that started recording COVID-19 deaths earlier tended to be more deprived, and  
81 more deprived authorities saw faster increases in their death rates. By 2020-04-06 (week 15, the  
82 time the March 23<sup>rd</sup> lockdown could have begun affecting deaths) the cumulative death rate in local  
83 authorities in the two most deprived deciles of IMD was 54% higher than the rate in the two least  
84 deprived deciles. By 2020-07-04 (week 27), this gap had narrowed to 29%. Thus, inequalities in  
85 mortality rates by decile of deprivation persisted throughout the first wave, but reduced somewhat  
86 during the lockdown.

**87 Conclusions**

88 This study found significant differences in the dynamics of COVID-19 mortality at the local authority  
89 level, resulting in inequalities in cumulative mortality rates during the first wave of the pandemic.  
90 The first lockdown in England was fairly strict – and the study found that it particularly benefited  
91 those living in the more deprived local authorities. Care should be taken to implement lockdowns  
92 early enough, in the right places - and at a sufficiently strict level- to maximally benefit all  
93 communities, and reduce inequalities.

94  
95 **Word Count: 3405**

## 96 Introduction

97 Since the early days of the SARS-CoV-2 pandemic in 2020, inequalities in case, hospitalisation and  
98 death rates have been noted internationally(1–7). The most deprived populations and areas in the  
99 USA, Europe and other high-income countries have suffered up to twice the mortality rates of the  
100 least deprived sections of society(2,8,9). In addition, inequalities in disease burden have been noted  
101 across levels of income, education, employment, sex, age, and especially between different ethnic  
102 groups, where people of Black and minority ethnic backgrounds have suffered many more cases  
103 (and deaths) than their white counterparts(10). However, the evolution of geographical inequalities  
104 in the pandemic over time - and the impact of national lock downs on them – has not previously  
105 been examined. This study addresses this evidence gap by providing the first analysis of inequalities  
106 in the evolution of the pandemic in different English local authorities and the impact of the first  
107 national lock down on them.

108  
109 Most countries employed national lockdowns of varying duration and severity to mitigate disease  
110 spread, alongside social distancing and hygiene-related advice. The factors used to determine when  
111 a lockdown should begin or cease were rarely transparent, but most appeared to reduce infection  
112 rates to some degree after a lag phase, and saw a rebound of varying size following their release(11–  
113 13). The first confirmed cases of COVID-19 were recorded in England in York in January 2020 and the  
114 first death in England was on March 5<sup>th</sup>. From 2020-04-23 until 2020-07-04, a national lockdown was  
115 implemented across England. In keeping with many other European countries, this was  
116 characterised by a 12 week ‘stay at home’ order (SI 350) - whereby people could only go outside for  
117 certain "very limited purposes" - to buy food, to exercise once a day, for medical reasons or to care  
118 for a vulnerable person, or to go to work if they absolutely could not work from home(12). Face-to-  
119 face education was suspended and many workplaces closed down - and staff furloughed -  
120 particularly in the hospitality, travel and retail sectors. As nationally cases, hospitalisation and death

1  
2  
3 121 rates started to fall the lockdown was gradually released over a period of several months -  
4  
5 122 culminating in the so-called 'Super Saturday' on 2020-07-04 when pubs, restaurants, hairdressers,  
6  
7 123 and cinemas reopened – albeit with strict social distancing rules(13).  
8  
9

10 124

11  
12 125 It has been noted that when national epidemic dynamics are used to examine population health,  
13  
14 126 they can mask important sub-national variation in disease spread, thus mitigation strategies that rely  
15  
16 127 solely on the national data to inform implementation timings could inadvertently worsen health  
17  
18 128 inequalities across geographical areas(11,13). Previous descriptive studies and reports of inequalities  
19  
20 129 in COVID-19 mortality have only focused on cumulative measures over set timespans, without  
21  
22 130 documenting the disparities in evolution of mortality rates(5,14,15), have been restricted to higher  
23  
24 131 geographies(18), or have not focussed on the effects of lockdowns (7,19). An understanding of how  
25  
26 132 the evolution of the pandemic differed by area and the impact of national mitigation strategies on  
27  
28 133 geographical inequalities in COVID-19 mortality could help inform future policies targeted at  
29  
30 134 minimising viral spread whilst preventing the widening (or even actively decreasing) health  
31  
32 135 inequalities.  
33  
34  
35

36 136

37  
38  
39 137 This paper uses COVID-19 mortality data from the first wave of the pandemic in England to provide  
40  
41 138 the first interrogation of geographical inequalities in the evolution of the pandemic. It sets out the  
42  
43 139 first analysis of when death rates rose, peaked and fell in local authorities of differing levels of  
44  
45 140 deprivation, and it describes the effects – and the timing of - the first national lockdown on these  
46  
47 141 inequalities.  
48  
49

50 142

51  
52  
53 143 **Methods**  
54  
55  
56  
57  
58  
59  
60

1  
2  
3 144 Weekly counts of COVID-19 deaths (based on any mention of Coronavirus on the death certificate)  
4  
5 145 for 312 lower-tier local authorities (excluding county councils) in England were obtained from the  
6  
7 146 Office for National Statistics (ONS) covering the period from 1<sup>st</sup> January 2020 to 4<sup>th</sup> July 2020, by date  
8  
9 147 of registration (16). Weekly COVID-19 death counts at the local authority level were not available per  
10  
11 148 age group, thus age-standardised rates were calculated via monthly age-standardised rates.  
12  
13 149 Monthly age-standardised COVID-19 mortality rates per local authority for the period March to July  
14  
15 150 2020 were similarly obtained from ONS(21). The monthly rate was divided between the constituent  
16  
17 151 weeks based on the share of monthly deaths in each week. Where all age-standardised rates for a  
18  
19 152 local authority were suppressed by ONS due to disclosure controls, the authority was excluded from  
20  
21 153 analyses (n=4). The level of deprivation of each local authority was determined by the rank of  
22  
23 154 average rank of the Index of Multiple Deprivation (IMD), which was converted into deciles (decile 1  
24  
25 155 contained the most deprived 10% of local authorities) from downloaded data(17). In addition, data  
26  
27 156 from the Isles of Scilly and the City of London were excluded due to well-known mortality data  
28  
29 157 quality issues and low population counts.  
30  
31  
32  
33  
34  
35

36 159 A number of metrics were calculated for each local authority; the 'starting week' was the first week  
37  
38 160 where 1 or more COVID-19 deaths were registered, the 'peak' was the highest weekly age-  
39  
40 161 standardised mortality rate per area using a 3-week rolling mean of weekly death rates, and the  
41  
42 162 'total mortality rate' was the cumulative sum of age-standardised weekly mortality rates over the  
43  
44 163 whole study period. The speed of increase was defined as the change in mortality rate between 25%  
45  
46 164 of peak and the peak rate, divided by the number of weeks between them, and similarly the speed  
47  
48 165 of descent was calculated using the peak rate and subsequent reduction to 50% of peak (25 and 50%  
49  
50 166 selected to include time window when epidemic peaks were visibly most stable). An assumption was  
51  
52 167 made that any change in population incidence of COVID-19 cases may begin to be seen 2 weeks later  
53  
54 168 in mortality data, thus analyses of the effect of lockdown focused on the period before or after week  
55  
56  
57  
58  
59  
60

1  
2  
3 169 15 (lockdown was announced in week 13 [March 2020] and ended on 'Super Saturday' [July 4<sup>th</sup>,  
4  
5 170 week 27], which is shown in timeline plots). The 'peak difference' was the difference in weeks  
6  
7 171 between the peak mortality rate and the week in which lockdown began to take effect (week 15).  
8  
9

10 172

11  
12 173 Weekly age-standardised mortality rates per IMD decile were not available at the time of writing,  
13  
14 174 thus they were calculated from other existing data, in a similar but distinct method from local  
15  
16 175 authority rates. Firstly, the denominators from local authority-level monthly age standardised  
17  
18 176 mortality rates were calculated using the death counts and rates provided. These 'modified'  
19  
20 177 population estimates were summed across local authorities within the same IMD decile, and counts  
21  
22 178 of COVID-19 deaths were similarly summed by decile. Weekly age-standardised rates per 100,000  
23  
24 179 people were then calculated as the sum of deaths divided by the modified summed population  
25  
26 180 estimate, multiplied by 100,000.  
27  
28  
29

30 181

31  
32 182 Simple linear models were employed to analyse the associations between visually normally  
33  
34 183 distributed measures such as the total cumulative mortality rate with other metrics and IMD decile.  
35  
36 184 No model selection was employed, covariate inclusion was based on empirical knowledge.  
37  
38  
39

40 185

41  
42 186 Maps were drawn based on 2020 geographical boundaries from the ONS Open Geography  
43  
44 187 Portal(18).  
45  
46

47 188

48  
49  
50 189 All analyses were conducted in R statistical software version 3.6.2.  
51  
52

53 190

54  
55 191 **Patient and Public Involvement**  
56  
57

1  
2  
3 192 Our public involvement panel inputted into project design and considered the research topic to be of  
4  
5 193 contemporary importance and value. The data used do not require patient permissions for use and  
6  
7 194 are publicly available.  
8  
9

10 195

## 11 12 196 **Results**

13  
14  
15 197 All 307 lower-tier local authorities in England began registering deaths involving COVID-19 between  
16  
17 198 weeks 11 and 15. The proportion of areas of each IMD decile per 'starting week' is shown in Figure 1.  
18  
19 199 From this it can be seen that more deprived areas (most deprived decile = 1) tended to begin  
20  
21 200 recording COVID-19 deaths earlier than less deprived areas (least deprived decile = 10).  
22  
23

24 201

25  
26  
27 202 **Figure 1. Proportion of 312 English local authorities within each IMD decile that began recording**  
28  
29 203 **COVID-19 deaths between weeks 11 and 15 of 2020.**

30  
31  
32 204

33  
34 205 Figure 2 depicts the weekly mortality rates per 100,000 people for each IMD decile. After the first  
35  
36 206 two weeks of the epidemic, the two most deprived deciles (20% of local authorities) had the highest  
37  
38 207 speed of increase in age-standardised mortality rates and reached higher peak rates than less  
39  
40 208 deprived areas.  
41  
42

43 209

44  
45  
46 210 **Figure 2. Weekly age-standardised COVID-19 mortality rates per 100,000 in areas of each IMD**  
47  
48 211 **decile. Dotted line indicates the start of the first national lockdown (26<sup>th</sup> March).**

49  
50  
51 212

52  
53  
54 213 From the week of their first COVID-19 deaths to week 15 (when lockdown could plausibly have  
55  
56 214 begun affecting death rates), local authorities in the two most deprived deciles had the highest  
57

1  
2  
3 215 speed of increase in death rate (albeit not statistically significantly different), and the less deprived  
4  
5 216 deciles increased more slowly (Figure 3). The mean speed of increase in two the most deprived local  
6  
7 217 authorities was 4.03 deaths per 100,000 persons per week, and in the two least deprived local  
8  
9 218 authorities was 2.18 deaths per 100,000 persons per week (a difference of 46%).  
10

11  
12 219

13  
14  
15 220

16  
17 221 **Figure 3. Simple linear gradient of age-standardised COVID-19 death rate per 100,000 people**  
18  
19 222 **between the first week of recorded COVID-19 deaths and week 15, across rank of average rank of**  
20  
21 223 **IMD deciles.**  
22

23  
24  
25 224

26  
27 225 All local authorities' death rate curves peaked and began to decline between 3 and 10 weeks  
28  
29 226 following the start of the first lockdown. Those local authorities whose death rates were increasing  
30  
31 227 faster before lockdown peaked sooner after lockdown commenced compared to slower local  
32  
33 228 authorities.  
34

35  
36 229 The total age-standardised cumulative mortality over the first wave (up to week 27, week  
37  
38 230 commencing 2020-06-28) varied from 119 to 2349 deaths per 100,000 persons per local authority.  
39  
40 231 Table 1 describes the multivariable linear model of total cumulative death rates per local authority.  
41  
42 232 It shows that, compared to the most deprived 10% of local authorities, less deprived areas (deciles 3-  
43  
44 233 10) recorded lower cumulative death rates, and that areas with higher speeds of increase - and more  
45  
46 234 weeks of recorded COVID-19 deaths before lockdown (plus those that peaked later) - saw higher  
47  
48 235 total death rates.  
49

50  
51  
52 236

53  
54 237 **Table 1. Linear multivariable model of the total cumulative age-standardised COVID-19 death rate**  
55  
56 238 **per 100,000 persons between weeks 1 and 27 of 2020, among 307 local authorities in England.**  
57

| Metric                                                                 | Coefficient (SE) | P-value |
|------------------------------------------------------------------------|------------------|---------|
| <b>IMD decile</b>                                                      |                  |         |
| <b>1 (most deprived)</b>                                               | REF              |         |
| <b>2</b>                                                               | -41.16 (49.30)   | 0.40    |
| <b>3</b>                                                               | -108.20 (50.46)  | 0.03    |
| <b>4</b>                                                               | -132.11 (49.80)  | 0.008   |
| <b>5</b>                                                               | -140.82 (50.83)  | 0.006   |
| <b>6</b>                                                               | -183.66 (50.64)  | <0.001  |
| <b>7</b>                                                               | -225.06 (50.81)  | <0.001  |
| <b>8</b>                                                               | -170.43 (51.01)  | <0.001  |
| <b>9</b>                                                               | -213.73 (50.82)  | <0.001  |
| <b>10</b>                                                              | -262.16 (50.28)  | <0.001  |
| <b>Speed of increase (to week 15), deaths per 100,000 per week</b>     | 12.87 (0.47)     | <0.001  |
| <b>Weeks from week of first registered COVID-19 deaths to lockdown</b> | 216.98 (13.04)   | <0.001  |
| <b>Weeks between peak and lockdown</b>                                 | 104.56 (17.38)   | <0.001  |

239

240 As mentioned, all local authorities began recording COVID-19 deaths between weeks 11 and 15, i.e.,  
 241 from 2 weeks before the announcement of the first lockdown, to 2 weeks after. The difference in  
 242 total cumulative death rates for areas grouped by starting week are as seen in Table 2.

243



244 **Table 2. Mean cumulative COVID-19 death rate per 100,000 persons over the first wave (weeks 1**  
 245 **to 27, 2020) of the pandemic among 307 local authorities in England.**

| Timing of start week relative to week 13 (when lockdown 1 was announced) | Total cumulative age-standardised COVID-19 death rate per 100,000 persons for whole of wave 1 (weeks 1 to 27, 2020), (SD) | Number of local authorities |
|--------------------------------------------------------------------------|---------------------------------------------------------------------------------------------------------------------------|-----------------------------|
| 2 weeks before                                                           | 465 (451)                                                                                                                 | 14                          |
| 1 week before                                                            | 780 (324)                                                                                                                 | 124                         |
| Same week                                                                | 984 (407)                                                                                                                 | 101                         |
| 1 week after                                                             | 1188 (505)                                                                                                                | 63                          |
| 2 weeks after                                                            | 1147 (255)                                                                                                                | 5                           |

246

247

248 Figure 4 depicts the cumulative COVID-19 death rates of each IMD decile over the whole of the first  
 249 wave. Mortality rates in more deprived areas (deciles 1 and 2) were rising faster than others at the  
 250 start of lockdown (vertical dotted line), and the disparity in cumulative mortality grew as the  
 251 pandemic progressed.

252

253 **Figure 4. Cumulative COVID-19 death rates per 100,000 for areas of each IMD decile over the first**  
 254 **wave of the pandemic in 307 local authorities in England. Dotted line marks timing of the**  
 255 **announcement of the first lockdown, zoomed in area between weeks 13 and 14.**

256

1  
2  
3 257 Up until week 15 when the effects of lockdown may have started to be seen in mortality data, the  
4  
5 258 cumulative death rate per 100,000 persons already differed by IMD decile. The two most deprived  
6  
7 259 deciles recorded 77.16 deaths per 100,000 persons by this time, whereas the two least deprived  
8  
9 260 deciles recorded only 50.01 deaths per 100,000 persons. This inequality reduced by the time the first  
10  
11 261 wave had passed (by week 27), but did not equalise, with the most deprived two deciles recording  
12  
13 262 316.14 total deaths per 100,000 persons, and the least deprived recording 245.10 deaths per 100,00  
14  
15 263 persons. These equate to an excess of 54% before lockdown versus 29% after lockdown.  
16  
17  
18  
19  
20

21 265 Figure 5 illustrates the geographical distribution of deprivation based on IMD and the total  
22  
23 266 cumulative age-standardised COVID-19 death rate per 100,000 persons over the first wave of the  
24  
25 267 pandemic. London and the North West featured many of the areas with the highest overall death  
26  
27 268 rates. Although these areas featured many deprived local authorities, the distributions were not  
28  
29 269 identical.  
30  
31  
32  
33  
34

35 271 **Figure 5. Average rank of the index of multiple deprivation (IMD) and total cumulative COVID-19**  
36  
37 272 **death rate per 100,000 persons over the first wave of the pandemic (weeks 1 to 27, 2020) per local**  
38  
39 273 **authority in England.**  
40  
41  
42  
43

## 44 275 Discussion

45  
46  
47 276 This study has provided the first examination of the evolution of inequalities in the COVID-19  
48  
49 277 pandemic. It has found that inequalities in COVID-19 mortality rates by deprivation in England began  
50  
51 278 to appear early in the first wave. More deprived local authorities generally started recording COVID-  
52  
53 279 19 deaths earlier than less deprived areas, and mortality rates also increased faster in more deprived  
54  
55 280 areas, and rose to higher peak rates. All of the 307 lower-tier local authorities in England began  
56  
57  
58  
59  
60

1  
2  
3 281 recording COVID-19 deaths as early as 2 weeks before first national lockdown in England was  
4  
5 282 announced, or up to 2 weeks afterwards, with the latter – less deprived - group of local authorities  
6  
7 283 recording fewer cumulative deaths over the whole of the first wave, compared to the former – more  
8  
9 284 deprived – group of local authorities.

10  
11  
12 285

13  
14 286 The study has also provided the first assessment of the impacts of the first English national lock  
15  
16 287 down on the evolution of the pandemic. It has found that following the implementation of the  
17  
18 288 national lockdown, local authorities where death rates had been rising faster (i.e. more deprived  
19  
20 289 areas), peaked and began to descend earlier than the other – less deprived – local authorities.

21  
22 290 Cumulative death rates were higher in more deprived areas by the time lockdown began, but the  
23  
24 291 difference narrowed moderately towards the end of the first wave.

25  
26  
27  
28 292

29  
30  
31 293

32  
33 294 England imposed a national lockdown during the first wave of the COVID-19 epidemic in March  
34  
35 295 2020(19). This measure aimed to drastically reduce instances of interpersonal contact between  
36  
37 296 infected individuals (whether symptomatic or not) and the wider susceptible population. Confining  
38  
39 297 the public to their homes, suspending face-to-face education and restricting travel placed great  
40  
41 298 burdens upon the health and welfare of many individuals and communities, through a number of  
42  
43 299 pathways that are still being elucidated, and which will continue to emerge(20–22). There is no  
44  
45 300 doubt that the economic implications of such lockdowns can be severe, and disruptions to usual  
46  
47 301 health care provision have led to increased mortality from non-COVID causes (23). However, the  
48  
49 302 risks posed to society of not imposing such lockdowns are likely much greater(24). Unchecked viral  
50  
51 303 spread would lead to mass fatalities, increased disability rates especially in the young from the  
52  
53 304 effects of non-fatal infection (so-called 'Long COVID'(25)), and an increased risk of viral mutation  
54  
55  
56  
57  
58  
59  
60

1  
2  
3 305 into forms which may pose even greater threat(26). Importantly, the National Health Service (NHS)  
4  
5 306 could potentially be filled beyond capacity with COVID-19 patients, leaving insufficient resources for  
6  
7 307 non-COVID patients of all ages and diagnoses. Economic implications of unchecked viral spread are  
8  
9 308 likely to be considerably worse than those caused by national lockdowns, and could continue for  
10  
11 309 longer due to the likelihood of future outbreaks of mutated viral strains and multiple waves of  
12  
13 310 infection(24). A well-timed national lockdown has the ability to reduce case incidence to low levels  
14  
15 311 at which 'test, trace and isolate' programs can efficiently extinguish local outbreaks, and lends time  
16  
17 312 for mass vaccination to offer protection, especially to the most vulnerable. However, a lockdown  
18  
19 313 that is imposed too late, i.e. when disease incidence is already high and rising, needs to be  
20  
21 314 substantially more stringent and protracted to offer the same slowing effect on case numbers and,  
22  
23 315 subsequently, deaths(24).  
24  
25  
26  
27  
28

29 317 Previous work has focused on comparing COVID-19 mortality rates between areas of England using  
30  
31 318 set time periods without considering the evolution of the inequalities reported(21), or have  
32  
33 319 identified inequalities in case rates and other metrics(13). Using mortality data removes some of the  
34  
35 320 uncertainty surrounding early case ascertainment, since early in the English epidemic, testing was  
36  
37 321 only being performed in hospitals on symptomatic individuals, and so many infections would not  
38  
39 322 have been recorded.  
40  
41  
42  
43  
44

45 324 It has been noted internationally that the seeding of SARS-CoV-2 into a country tends to be via travel  
46  
47 325 by people at the upper end of the socio-economic spectrum, taking international holidays or  
48  
49 326 travelling for business(27,28). Cases then increase within these less deprived populations until social  
50  
51 327 distancing and national lockdowns are advised or mandated. At this point, the disease burden shifts  
52  
53 328 to the more deprived, who are less able to fully adhere to these guidelines due to less ability to work  
54  
55 329 from home, fewer resources, precarious work, higher population densities and other pre-existing  
56  
57  
58  
59  
60

1  
2  
3 330 factors(27). These two 'phases' of pandemic spread likely apply to COVID-19 cases in England, where  
4  
5 331 the index cases were holidaymakers returning from skiing trips to Austria(29,30). Plümper *et al*  
6  
7 332 (2020) reported that in Germany, despite a somewhat reduced likelihood of infection for those in  
8  
9 333 more deprived areas in the first phase of the epidemic, these communities were nevertheless at  
10  
11 334 similar risk of death. This relative risk of mortality increases for more deprived areas once  
12  
13 335 transmission is established in 'phase 2' of the pandemic – due to population vulnerabilities including  
14  
15 336 poverty, overcrowding and pre-existing chronic conditions(6). Our analysis of early-stage mortality in  
16  
17 337 England confirmed this structure, in that mortality rates rose first to a small initial 'peak' in less  
18  
19 338 deprived areas, before being dominated by more deprived local authorities. The earliest data  
20  
21 339 available to the German study began more than 2 weeks following the implementation of  
22  
23 340 government lockdowns, whereas the analysis we present here predate the UK lockdown by a  
24  
25 341 number of months, and hence capture the very earliest data available on COVID-19 deaths.  
26  
27  
28  
29  
30

31 343 We have shown that inequalities in cumulative death rates during the first wave of infection in  
32  
33 344 England existed from the earliest stages of COVID-19 mortality reporting, and were entrenched by  
34  
35 345 differences in the speed of increase, leading to unequal burdens of cumulative mortality at local  
36  
37 346 authority level by the time the first national lockdown was called. These inequalities reduced  
38  
39 347 marginally but were not abolished by the national control measures implemented in the lockdown.  
40  
41 348 The first national lockdown in England was fairly strict (e.g. a 'stay at home order') and it was a  
42  
43 349 universal intervention, enforced and applied to the whole population and thereby requiring little by  
44  
45 350 way of individual agency. Previous public health research has shown that such measures are more  
46  
47 351 likely to reduce inequalities in health than those that require individual choice/compliance(31). That  
48  
49 352 the lockdown did not completely eliminate geographical inequalities in COVID-19 mortality may well  
50  
51 353 be as a result of inequalities in (1) *vulnerability* (whereby more deprived areas had a higher burden  
52  
53 354 of clinical risk factors); (2) *susceptibility* (whereby immune response was lower in more deprived  
54  
55  
56  
57  
58  
59  
60

1  
2  
3 355 populations due to the adverse consequences of long term exposures to harmful living and  
4  
5 356 environmental conditions); (3) *exposure* (inequalities in working conditions notably less ability to  
6  
7 357 work at home in the low income jobs predominating within more deprived local authorities); and (4)  
8  
9 358 *transmission* (higher rates of overcrowding and population density in the community may have  
10  
11 359 impacted on infection spread in more deprived areas)(6).  
12  
13  
14 360

## 16 361 **Conclusion**

19 362 This study has found that inequalities in death rates during the first wave of infection in England  
20  
21 363 existed from the earliest stages of the COVID-19 pandemic, and were entrenched by differences in  
22  
23 364 the speed of increase. This led to a significant unequal burden in cumulative mortality between the  
24  
25 365 most and least deprived local authorities by the time the first national lockdown was implemented.  
26  
27 366 These inequalities reduced marginally - but were not abolished - during the national lockdown. It is  
28  
29 367 impossible to say with certainty whether an earlier – or longer - national lockdown could have  
30  
31 368 further reduced these inequalities, but it should be noted that, although the lockdown did reverse  
32  
33 369 the trend in mortality rates across the country, it had to do so at more advanced stages of the  
34  
35 370 epidemic in more deprived areas, compounding the unequal disease burden upon these  
36  
37 371 communities and local health care systems. Susceptibility to infection and fatality from COVID-19 is  
38  
39 372 undoubtedly closely associated with deprivation, but other factors also play an important part, as  
40  
41 373 well as the stochasticity implicit in viral spread. Nevertheless, our understanding of how deprivation  
42  
43 374 associates with mortality from a novel infectious disease within a virgin population it can help to  
44  
45 375 focus future public health attention on those communities most in need and at risk.  
46  
47  
48  
49 376

## 52 377 **Limitations**

53  
54  
55  
56  
57  
58  
59  
60

1  
2  
3 378 Weekly age-standardised mortality rates were not available at local authority level at the time of  
4  
5 379 writing. However, we were able to pro rata monthly age-standardised rates to weekly ones using  
6  
7 380 weekly death counts. Age-standardised weekly rates are unlikely to become available at lower  
8  
9 381 geography levels due to disclosure risks. Death counts did not include deaths of non-residents of  
10  
11 382 England, nor where place of residence was unknown, and was based on date of registration rather  
12  
13 383 than date of death.

14  
15  
16 384 Deprivation is undoubtedly linked to COVID-19 mortality, it cannot explain all of the variation in  
17  
18 385 area-level mortality rates, hence COVID-19 mortality and IMD are not perfectly correlated. Many  
19  
20 386 other factors including comorbidity, healthcare provision, employment types and variation in  
21  
22 387 transport links all likely play a part in the causal web linking lockdowns to mortality inequalities. A  
23  
24 388 deeper analysis of these underlying associations was beyond the scope of the current paper, but  
25  
26 389 warrants further scrutiny.

27  
28  
29 390

30  
31  
32 391 **Author Statement**

33  
34  
35 392 FM, CB and CW designed the study. CW completed all analyses with input from FM and CB. CW, VA,  
36  
37 393 FM and CB all contributed to drafting the manuscript. The corresponding author attests that all listed  
38  
39 394 authors meet authorship criteria and that no others meeting the criteria have been omitted. CW is  
40  
41 395 guarantor of the analysis.

42  
43  
44 396 The Corresponding Author has the right to grant on behalf of all authors and does grant on behalf of  
45  
46 397 all authors, a worldwide licence to the Publishers and its licensees in perpetuity, in all forms, formats  
47  
48 398 and media (whether known now or created in the future), to i) publish, reproduce, distribute, display  
49  
50 399 and store the Contribution, ii) translate the Contribution into other languages, create adaptations,  
51  
52 400 reprints, include within collections and create summaries, extracts and/or, abstracts of the  
53  
54 401 Contribution, iii) create any other derivative work(s) based on the Contribution, iv) to exploit all

1  
2  
3 402 subsidiary rights in the Contribution, v) the inclusion of electronic links from the Contribution to  
4  
5 403 third party material where-ever it may be located; and, vi) licence any third party to do any or all of  
6  
7 404 the above.  
8  
9

10 405

11  
12 406 **References**  
13

- 14  
15 407 1. Pillai J, Motloba P, Motaung KSC, Ozougwu LU, Ikalafeng BK, Marinda E, et al. The effect of  
16 408 lockdown regulations on SARS-CoV-2 infectivity in Gauteng Province, South Africa. *South*  
17 409 *African Medical Journal*. 2020;110(11):1119–23.  
18  
19 410 2. Chen JT, Krieger N. Revealing the unequal burden of COVID-19 by income, race/ethnicity, and  
20 411 household crowding: US county versus zip code analyses. *Journal of Public Health*  
21 412 *Management and Practice*. 2021;27(1):S46–56.  
22  
23 413 3. Laster Pirtle WN. Racial Capitalism: A Fundamental Cause of Novel Coronavirus (COVID-19)  
24 414 Pandemic Inequities in the United States. *Health Education and Behavior*. 2020;  
25  
26 415 4. van Barneveld K, Quinlan M, Kriesler P, Junor A, Baum F, Chowdhury A, et al. The COVID-19  
27 416 pandemic: Lessons on building more equal and sustainable societies. *Economic and Labour*  
28 417 *Relations Review*. 2020;  
29  
30 418 5. Nazroo J, Becares L. Evidence for ethnic inequalities in mortality related to COVID-19  
31 419 infections: Findings from an ecological analysis of England and Wales. *medRxiv*. 2020;  
32  
33 420 6. Bambra C, Riordan R, Ford J, Matthews F. The COVID-19 pandemic and health inequalities.  
34 421 *Journal of Epidemiology and Community Health*. 2020;74(11):964–8.  
35  
36 422 7. Public Health England. Disparities in the risk and outcomes of COVID-19. 2020;89. Available  
37 423 from: [https://www.gov.uk/government/publications/covid-19-review-of-disparities-in-risks-](https://www.gov.uk/government/publications/covid-19-review-of-disparities-in-risks-and-outcomes)  
38 424 [and-outcomes](https://www.gov.uk/government/publications/covid-19-review-of-disparities-in-risks-and-outcomes)  
39  
40 425 8. Baena-Diéz JM, Barroso M, Cordeiro-Coelho SI, Díaz JL, Grau M. Impact of COVID-19 outbreak  
41 426 by income: Hitting hardest the most deprived. *Journal of Public Health (United Kingdom)*.  
42 427 2020;42(4):698–703.  
43  
44 428 9. Public Health England. Disparities in the risk and outcomes of COVID-19 [Internet]. London;  
45 429 2020. Available from: [www.facebook.com/PublicHealthEngland](http://www.facebook.com/PublicHealthEngland)  
46  
47 430 10. Katikireddi SV, Lal S, Carrol ED, Niedzwiedz CL, Khunti K, Dundas R, et al. Unequal impact of  
48 431 the COVID-19 crisis on minority ethnic groups: A framework for understanding and  
49 432 addressing inequalities. *Journal of Epidemiology and Community Health*. 2021;75(10):970–4.  
50  
51 433 11. Salvatore M, Basu D, Ray D, Kleinsasser M, Purkayastha S, Bhattacharyya R, et al.  
52 434 Comprehensive public health evaluation of lockdown as a non-pharmaceutical intervention  
53 435 on COVID-19 spread in India: National trends masking state-level variations. *BMJ Open*.  
54 436 2020;10(12).  
55  
56  
57  
58  
59  
60



- 1  
2  
3 437 12. Desvars-Larrive A, Dervic E, Haug N, Niederkrotenthaler T, Chen J, di Natale A, et al. A  
4 438 structured open dataset of government interventions in response to COVID-19. *Scientific*  
5 439 *Data*. 2020;7(1):1–9.
- 6  
7 440 13. Morrissey K, Spooner F, Salter J, Shaddick G. Area level deprivation and monthly COVID-19  
8 441 cases: The impact of government policy in England. *Social Science & Medicine* [Internet].  
9 442 2021;289(September):114413. Available from:  
10 443 <https://doi.org/10.1016/j.socscimed.2021.114413>
- 11  
12 444 14. HM Government. The Health Protection (Coronavirus, Restrictions) (England) Regulations  
13 445 2020 [Internet]. SI 350. 2020 [cited 2021 Feb 23]. Available from:  
14 446 <https://www.legislation.gov.uk/uksi/2020/350/contents/made>
- 15  
16 447 15. HM Government. The Health Protection (Coronavirus, Restrictions) (No. 2) (England)  
17 448 Regulations 2020 [Internet]. SI2020/684. 2020 [cited 2021 Feb 23]. Available from:  
18 449 <https://www.legislation.gov.uk/uksi/2020/684/contents/made>
- 19  
20 450 16. Sun Y, Hu X, Xie J. Spatial inequalities of COVID-19 mortality rate in relation to socioeconomic  
21 451 and environmental factors across England. *Science of the Total Environment*.  
22 452 2021;758(January).
- 23  
24 453 17. Platt L, Warwick R. COVID-19 and Ethnic Inequalities in England and Wales\*. *Fiscal Studies*.  
25 454 2020;41(2):259–89.
- 26  
27 455 18. Timson A. What geographic inequalities in COVID-19 mortality rates and health can tell us  
28 456 about levelling up | The Health Foundation. The Health Foundation [Internet]. 2021;(July).  
29 457 Available from: [https://www.health.org.uk/news-and-comment/charts-and-](https://www.health.org.uk/news-and-comment/charts-and-infographics/what-geographic-inequalities-in-covid-19-mortality-rates-can-tell-us-about-levelling-up)  
30 458 [infographics/what-geographic-inequalities-in-covid-19-mortality-rates-can-tell-us-about-](https://www.health.org.uk/news-and-comment/charts-and-infographics/what-geographic-inequalities-in-covid-19-mortality-rates-can-tell-us-about-levelling-up)  
31 459 [levelling-up](https://www.health.org.uk/news-and-comment/charts-and-infographics/what-geographic-inequalities-in-covid-19-mortality-rates-can-tell-us-about-levelling-up)
- 32  
33 460 19. Griffith GJ, Davey Smith G, Manley D, Howe LD, Owen G. Interrogating structural inequalities  
34 461 in COVID-19 mortality in England and Wales. *Journal of Epidemiology and Community Health*.  
35 462 2021;1–7.
- 36  
37 463 20. Office for National Statistics. Analysis of death registrations not involving coronavirus (COVID-  
38 464 19), England and Wales: 28 December 2019 to 1 May 2020. 2020.
- 39  
40 465 21. ONS. Deaths due to COVID-19 by local area and deprivation [Internet]. 2021. Available from:  
41 466 [https://www.ons.gov.uk/peoplepopulationandcommunity/birthsdeathsandmarriages/deaths](https://www.ons.gov.uk/peoplepopulationandcommunity/birthsdeathsandmarriages/deaths/datasets/deathsduetocovid19bylocalareaanddeprivation)  
42 467 [/datasets/deathsduetocovid19bylocalareaanddeprivation](https://www.ons.gov.uk/peoplepopulationandcommunity/birthsdeathsandmarriages/deaths/datasets/deathsduetocovid19bylocalareaanddeprivation)
- 43  
44 468 22. Ministry of Housing Communities & Local Government. English Indices of Deprivation 2019 -  
45 469 Summaries at Local Authority Level [Internet]. Open Data. 2019. Available from:  
46 470 <http://opendatacommunities.org/data/societal-wellbeing/imd2019/indicesbyla>
- 47  
48 471 23. Office for National Statistics. Local Authority Districts (December 2019) Boundaries UK BUC.  
49 472 Open Geography Portal [Internet]. Available from:  
50 473 [https://geoportal.statistics.gov.uk/datasets/local-authority-districts-december-2019-](https://geoportal.statistics.gov.uk/datasets/local-authority-districts-december-2019-boundaries-uk-buc)  
51 474 [boundaries-uk-buc](https://geoportal.statistics.gov.uk/datasets/local-authority-districts-december-2019-boundaries-uk-buc)
- 52  
53 475 24. BBC News. Coronavirus: Strict new curbs on life in UK announced by PM [Internet]. 2020.  
54 476 Available from: <https://www.bbc.co.uk/news/uk-52012432>

- 1  
2  
3 477 25. Richardson DL, Duncan MJ, Clarke ND, Myers TD, Tallis J. The influence of COVID-19 measures  
4 478 in the United Kingdom on physical activity levels, perceived physical function and mood in  
5 479 older adults: A survey-based observational study. *Journal of Sports Sciences* [Internet].  
6 480 2020;00(00):1–13. Available from: <https://doi.org/10.1080/02640414.2020.1850984>  
7  
8 481 26. Ball S, Banerjee A, Berry C, Boyle JR, Bray B, Bradlow W, et al. Monitoring indirect impact of  
9 482 COVID-19 pandemic on services for cardiovascular diseases in the UK. *Heart*.  
10 483 2020;106(24):1890–7.  
11  
12 484 27. Henry N, Parthiban S, Farroha A. The effect of COVID-19 lockdown on the incidence of  
13 485 deliberate self-harm injuries presenting to the emergency room. *International Journal of*  
14 486 *Psychiatry in Medicine*. 2020;1–12.  
15  
16 487 28. Vandoros S. Excess mortality during the Covid-19 pandemic: Early evidence from England and  
17 488 Wales. *Social Science and Medicine* [Internet]. 2020;258(June):113101. Available from:  
18 489 <https://doi.org/10.1016/j.socscimed.2020.113101>  
19  
20 490 29. Balmford B, Annan JD, Hargreaves JC, Altoè M, Bateman IJ. Cross-Country Comparisons of  
21 491 Covid-19: Policy, Politics and the Price of Life. *Environmental and Resource Economics*  
22 492 [Internet]. 2020;76(4):525–51. Available from: <https://doi.org/10.1007/s10640-020-00466-5>  
23  
24 493 30. Iacobucci G. Long covid: Damage to multiple organs presents in young, low risk patients. *Bmj*.  
25 494 2020;m4470.  
26  
27 495 31. European Centre for Disease Prevention and Control. Risk related to the spread of new SARS-  
28 496 CoV-2 variants of concern in the EU/EEA-first update. 2021;(January):29. Available from:  
29 497 [https://beta.microreact.org/project/r8vBmatkC9mcrJJ6bUtNr-cog-uk-2021-01-09-sars-cov-](https://beta.microreact.org/project/r8vBmatkC9mcrJJ6bUtNr-cog-uk-2021-01-09-sars-cov-2-in-the-uk/)  
30 498 [2-in-the-uk/](https://beta.microreact.org/project/r8vBmatkC9mcrJJ6bUtNr-cog-uk-2021-01-09-sars-cov-2-in-the-uk/)  
31  
32 499 32. Plümper T, Neumayer E. The pandemic predominantly hits poor neighbourhoods? SARS-CoV-  
33 500 2 infections and COVID-19 fatalities in German districts. *European journal of public health*.  
34 501 2020;30(6):1176–80.  
35  
36 502 33. Clouston SAP, Natale G, Link BG. Socioeconomic inequalities in the spread of coronavirus-19  
37 503 in the United States: A examination of the emergence of social inequalities. *Social Science*  
38 504 *and Medicine* [Internet]. 2021;268(November 2020):113554. Available from:  
39 505 <https://doi.org/10.1016/j.socscimed.2020.113554>  
40  
41 506 34. Wikipedia. COVID-19 pandemic in the United Kingdom [Internet]. [cited 2021 Feb 4].  
42 507 Available from: [https://en.wikipedia.org/wiki/COVID-19\\_pandemic\\_in\\_the\\_United\\_Kingdom](https://en.wikipedia.org/wiki/COVID-19_pandemic_in_the_United_Kingdom)  
43  
44 508 35. Correa-Martínez CL, Kampmeier S, Kümpers P, Schwierzeck V, Hennies M, Hafezi W, et al. A  
45 509 pandemic in times of global tourism: Superspreading and exportation of COVID-19 cases from  
46 510 a ski area in Austria. *Journal of Clinical Microbiology*. 2020;58(6):19–21.  
47  
48 511 36. Adams J, Mytton O, White M, Monsivais P. Why Are Some Population Interventions for Diet  
49 512 and Obesity More Equitable and Effective Than Others? The Role of Individual Agency. *PLoS*  
50 513 *Medicine*. 2016;13(4):1–7.  
51  
52 514

1  
2  
3  
4  
5  
6  
7  
8  
9  
10  
11  
12  
13  
14  
15  
16  
17  
18  
19  
20  
21  
22  
23  
24  
25  
26  
27  
28  
29  
30  
31  
32  
33  
34  
35  
36  
37  
38  
39  
40  
41  
42  
43  
44  
45  
46  
47  
48  
49  
50  
51  
52  
53  
54  
55  
56  
57  
58  
59  
60

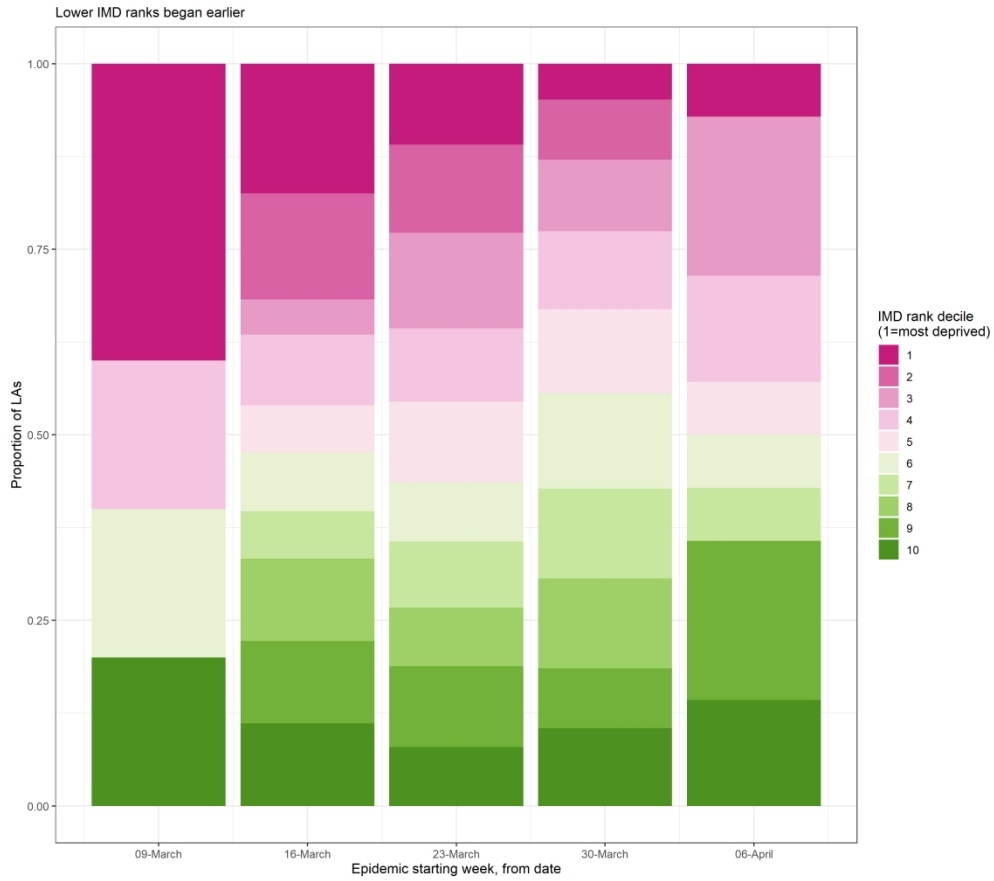

Proportion of 312 English local authorities within each IMD decile that began recording COVID-19 deaths between weeks 11 and 15 of 2020.

717x632mm (118 x 118 DPI)

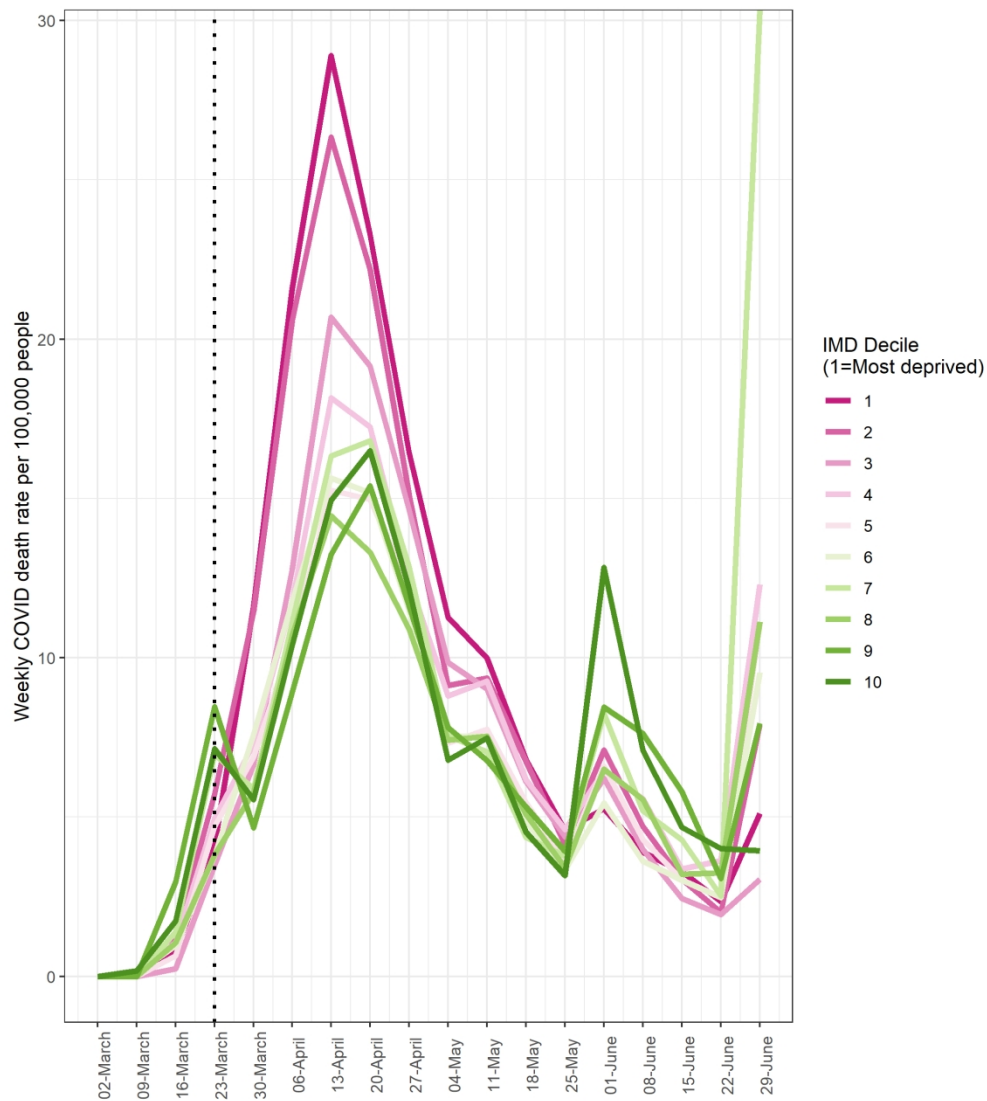

Weekly age-standardised COVID-19 mortality rates per 100,000 in areas of each IMD decile. Dotted line indicates the start of the first national lockdown (26th March).

497x562mm (118 x 118 DPI)

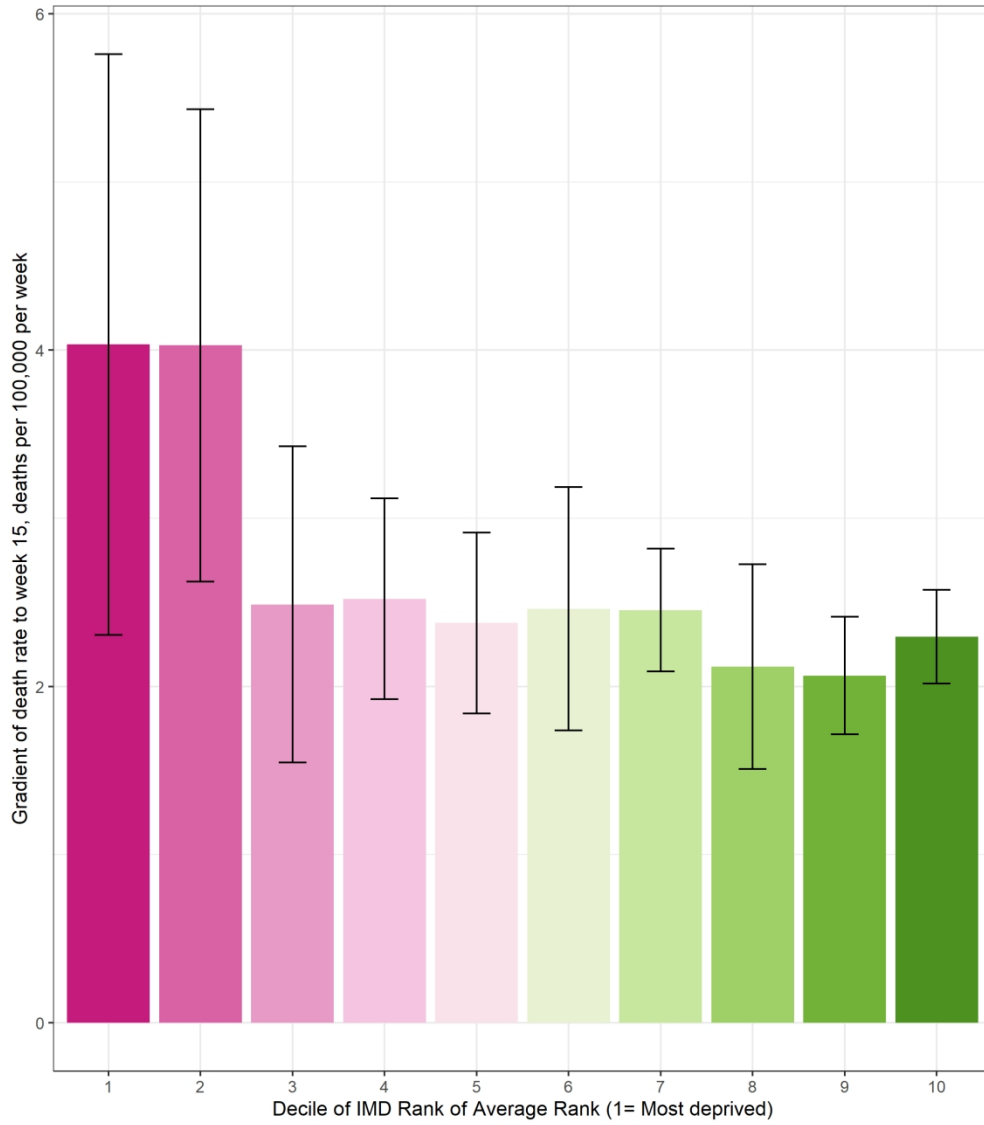

Simple linear gradient of age-standardised COVID-19 death rate per 100,000 people between the first week of recorded COVID-19 deaths and week 15, across rank of average rank of IMD deciles.

497x562mm (118 x 118 DPI)

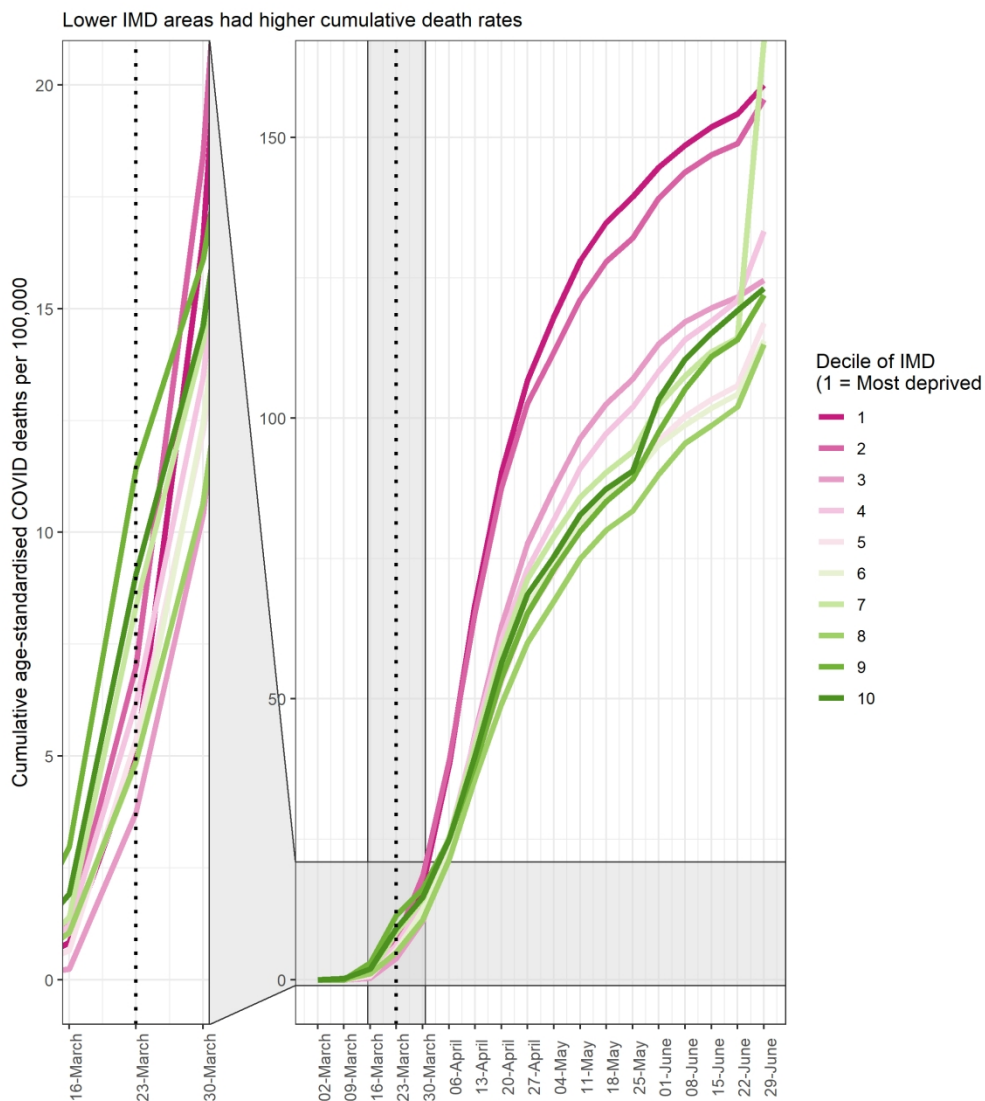

Cumulative COVID-19 death rates per 100,000 for areas of each IMD decile over the first wave of the pandemic in 307 local authorities in England. Dotted line marks timing of the announcement of the first lockdown, zoomed in area between weeks 13 and 14.

497x562mm (118 x 118 DPI)

1  
2  
3  
4  
5  
6  
7  
8  
9  
10  
11  
12  
13  
14  
15  
16  
17  
18  
19  
20  
21  
22  
23  
24  
25  
26  
27  
28  
29  
30  
31  
32  
33  
34  
35  
36  
37  
38  
39  
40  
41  
42  
43  
44  
45  
46  
47  
48  
49  
50  
51  
52  
53  
54  
55  
56  
57  
58  
59  
60

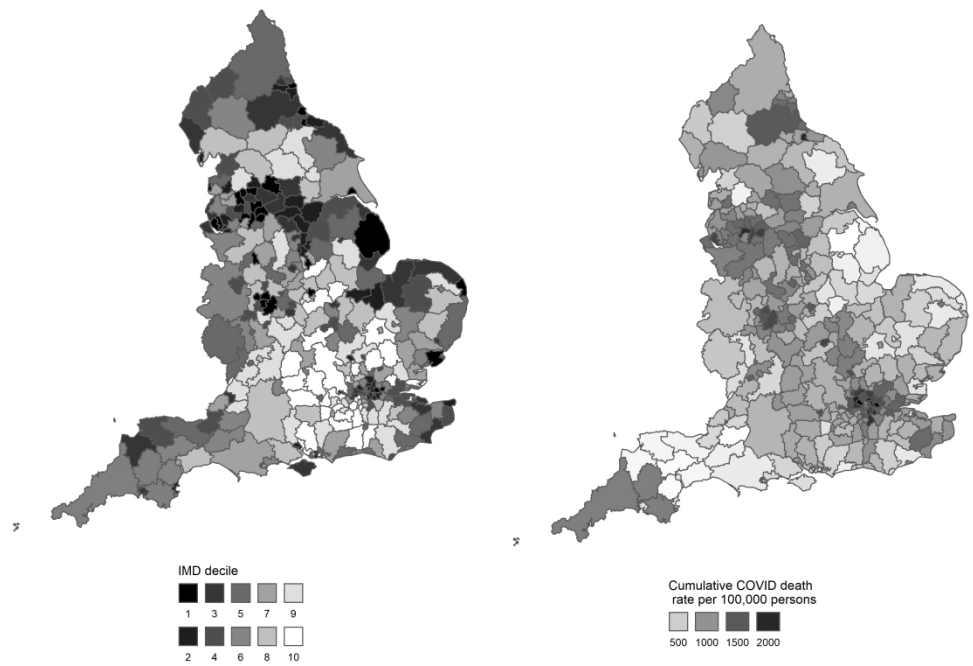

Average rank of the index of multiple deprivation (IMD) and total cumulative COVID-19 death rate per 100,000 persons over the first wave of the pandemic (weeks 1 to 27, 2020) per local authority in England.

774x562mm (118 x 118 DPI)

# Reporting checklist for cross sectional study.

Based on the STROBE cross sectional guidelines.

## Instructions to authors

Complete this checklist by entering the page numbers from your manuscript where readers will find each of the items listed below.

Your article may not currently address all the items on the checklist. Please modify your text to include the missing information. If you are certain that an item does not apply, please write "n/a" and provide a short explanation.

Upload your completed checklist as an extra file when you submit to a journal.

In your methods section, say that you used the STROBE cross sectional reporting guidelines, and cite them as:

von Elm E, Altman DG, Egger M, Pocock SJ, Gøtzsche PC, Vandenbroucke JP. The Strengthening the Reporting of Observational Studies in Epidemiology (STROBE) Statement: guidelines for reporting observational studies.

|                           |                     |                                                                                                 | Page<br>Number |
|---------------------------|---------------------|-------------------------------------------------------------------------------------------------|----------------|
| <b>Title and abstract</b> |                     |                                                                                                 |                |
| Title                     | <a href="#">#1a</a> | Indicate the study's design with a commonly used term in the title or the abstract              | 1              |
| Abstract                  | <a href="#">#1b</a> | Provide in the abstract an informative and balanced summary of what was done and what was found | 5              |
| <b>Introduction</b>       |                     |                                                                                                 |                |
| Background / rationale    | <a href="#">#2</a>  | Explain the scientific background and rationale for the investigation being reported            | 7,8            |
| Objectives                | <a href="#">#3</a>  | State specific objectives, including any prespecified hypotheses                                | 8              |
| <b>Methods</b>            |                     |                                                                                                 |                |
| Study design              | <a href="#">#4</a>  | Present key elements of study design early in the paper                                         | 9              |
| Setting                   | <a href="#">#5</a>  | Describe the setting, locations, and relevant dates, including periods of                       | 9,10           |



recruitment, exposure, follow-up, and data collection

|    |                      |                      |                                                                                                                                                                                                                                                                                |      |
|----|----------------------|----------------------|--------------------------------------------------------------------------------------------------------------------------------------------------------------------------------------------------------------------------------------------------------------------------------|------|
| 1  |                      |                      |                                                                                                                                                                                                                                                                                |      |
| 2  |                      |                      |                                                                                                                                                                                                                                                                                |      |
| 3  | Eligibility criteria | <a href="#">#6a</a>  | Give the eligibility criteria, and the sources and methods of selection of participants.                                                                                                                                                                                       | NA   |
| 4  |                      |                      |                                                                                                                                                                                                                                                                                |      |
| 5  |                      |                      |                                                                                                                                                                                                                                                                                |      |
| 6  |                      | <a href="#">#7</a>   | Clearly define all outcomes, exposures, predictors, potential confounders, and effect modifiers. Give diagnostic criteria, if applicable                                                                                                                                       | 9,10 |
| 7  |                      |                      |                                                                                                                                                                                                                                                                                |      |
| 8  |                      |                      |                                                                                                                                                                                                                                                                                |      |
| 9  |                      |                      |                                                                                                                                                                                                                                                                                |      |
| 10 | Data sources /       | <a href="#">#8</a>   | For each variable of interest give sources of data and details of methods of assessment (measurement). Describe comparability of assessment methods if there is more than one group. Give information separately for for exposed and unexposed groups if applicable.           | 9,10 |
| 11 | measurement          |                      |                                                                                                                                                                                                                                                                                |      |
| 12 |                      |                      |                                                                                                                                                                                                                                                                                |      |
| 13 |                      |                      |                                                                                                                                                                                                                                                                                |      |
| 14 |                      |                      |                                                                                                                                                                                                                                                                                |      |
| 15 |                      |                      |                                                                                                                                                                                                                                                                                |      |
| 16 |                      |                      |                                                                                                                                                                                                                                                                                |      |
| 17 | Bias                 | <a href="#">#9</a>   | Describe any efforts to address potential sources of bias                                                                                                                                                                                                                      | 9,10 |
| 18 |                      |                      |                                                                                                                                                                                                                                                                                |      |
| 19 | Study size           | <a href="#">#10</a>  | Explain how the study size was arrived at                                                                                                                                                                                                                                      | NA   |
| 20 |                      |                      |                                                                                                                                                                                                                                                                                |      |
| 21 | Quantitative         | <a href="#">#11</a>  | Explain how quantitative variables were handled in the analyses. If applicable, describe which groupings were chosen, and why                                                                                                                                                  | 9,10 |
| 22 | variables            |                      |                                                                                                                                                                                                                                                                                |      |
| 23 |                      |                      |                                                                                                                                                                                                                                                                                |      |
| 24 |                      |                      |                                                                                                                                                                                                                                                                                |      |
| 25 | Statistical          | <a href="#">#12a</a> | Describe all statistical methods, including those used to control for confounding                                                                                                                                                                                              | 10   |
| 26 | methods              |                      |                                                                                                                                                                                                                                                                                |      |
| 27 |                      |                      |                                                                                                                                                                                                                                                                                |      |
| 28 |                      |                      |                                                                                                                                                                                                                                                                                |      |
| 29 | Statistical          | <a href="#">#12b</a> | Describe any methods used to examine subgroups and interactions                                                                                                                                                                                                                | NA   |
| 30 | methods              |                      |                                                                                                                                                                                                                                                                                |      |
| 31 |                      |                      |                                                                                                                                                                                                                                                                                |      |
| 32 |                      |                      |                                                                                                                                                                                                                                                                                |      |
| 33 | Statistical          | <a href="#">#12c</a> | Explain how missing data were addressed                                                                                                                                                                                                                                        | NA   |
| 34 | methods              |                      |                                                                                                                                                                                                                                                                                |      |
| 35 |                      |                      |                                                                                                                                                                                                                                                                                |      |
| 36 |                      |                      |                                                                                                                                                                                                                                                                                |      |
| 37 | Statistical          | <a href="#">#12d</a> | If applicable, describe analytical methods taking account of sampling strategy                                                                                                                                                                                                 | 9,10 |
| 38 | methods              |                      |                                                                                                                                                                                                                                                                                |      |
| 39 |                      |                      |                                                                                                                                                                                                                                                                                |      |
| 40 |                      |                      |                                                                                                                                                                                                                                                                                |      |
| 41 | Statistical          | <a href="#">#12e</a> | Describe any sensitivity analyses                                                                                                                                                                                                                                              | NA   |
| 42 | methods              |                      |                                                                                                                                                                                                                                                                                |      |
| 43 |                      |                      |                                                                                                                                                                                                                                                                                |      |
| 44 | <b>Results</b>       |                      |                                                                                                                                                                                                                                                                                |      |
| 45 |                      |                      |                                                                                                                                                                                                                                                                                |      |
| 46 | Participants         | <a href="#">#13a</a> | Report numbers of individuals at each stage of study—eg numbers potentially eligible, examined for eligibility, confirmed eligible, included in the study, completing follow-up, and analysed. Give information separately for for exposed and unexposed groups if applicable. | 11   |
| 47 |                      |                      |                                                                                                                                                                                                                                                                                |      |
| 48 |                      |                      |                                                                                                                                                                                                                                                                                |      |
| 49 |                      |                      |                                                                                                                                                                                                                                                                                |      |
| 50 |                      |                      |                                                                                                                                                                                                                                                                                |      |
| 51 |                      |                      |                                                                                                                                                                                                                                                                                |      |
| 52 |                      |                      |                                                                                                                                                                                                                                                                                |      |
| 53 |                      |                      |                                                                                                                                                                                                                                                                                |      |
| 54 |                      |                      |                                                                                                                                                                                                                                                                                |      |
| 55 | Participants         | <a href="#">#13b</a> | Give reasons for non-participation at each stage                                                                                                                                                                                                                               | NA   |
| 56 |                      |                      |                                                                                                                                                                                                                                                                                |      |
| 57 | Participants         | <a href="#">#13c</a> | Consider use of a flow diagram                                                                                                                                                                                                                                                 | NA   |
| 58 |                      |                      |                                                                                                                                                                                                                                                                                |      |
| 59 |                      |                      |                                                                                                                                                                                                                                                                                |      |
| 60 |                      |                      |                                                                                                                                                                                                                                                                                |      |

|    |                    |                      |                                                                                                                                                                                                                   |       |
|----|--------------------|----------------------|-------------------------------------------------------------------------------------------------------------------------------------------------------------------------------------------------------------------|-------|
| 1  | Descriptive data   | <a href="#">#14a</a> | Give characteristics of study participants (eg demographic, clinical, social) and information on exposures and potential confounders. Give information separately for exposed and unexposed groups if applicable. | 11    |
| 2  |                    |                      |                                                                                                                                                                                                                   |       |
| 3  |                    |                      |                                                                                                                                                                                                                   |       |
| 4  |                    |                      |                                                                                                                                                                                                                   |       |
| 5  |                    |                      |                                                                                                                                                                                                                   |       |
| 6  | Descriptive data   | <a href="#">#14b</a> | Indicate number of participants with missing data for each variable of interest                                                                                                                                   | 11    |
| 7  |                    |                      |                                                                                                                                                                                                                   |       |
| 8  |                    |                      |                                                                                                                                                                                                                   |       |
| 9  |                    |                      |                                                                                                                                                                                                                   |       |
| 10 | Outcome data       | <a href="#">#15</a>  | Report numbers of outcome events or summary measures. Give information separately for exposed and unexposed groups if applicable.                                                                                 | 11    |
| 11 |                    |                      |                                                                                                                                                                                                                   |       |
| 12 |                    |                      |                                                                                                                                                                                                                   |       |
| 13 |                    |                      |                                                                                                                                                                                                                   |       |
| 14 | Main results       | <a href="#">#16a</a> | Give unadjusted estimates and, if applicable, confounder-adjusted estimates and their precision (eg, 95% confidence interval). Make clear which confounders were adjusted for and why they were included          | NA    |
| 15 |                    |                      |                                                                                                                                                                                                                   |       |
| 16 |                    |                      |                                                                                                                                                                                                                   |       |
| 17 |                    |                      |                                                                                                                                                                                                                   |       |
| 18 |                    |                      |                                                                                                                                                                                                                   |       |
| 19 | Main results       | <a href="#">#16b</a> | Report category boundaries when continuous variables were categorized                                                                                                                                             | NA    |
| 20 |                    |                      |                                                                                                                                                                                                                   |       |
| 21 | Main results       | <a href="#">#16c</a> | If relevant, consider translating estimates of relative risk into absolute risk for a meaningful time period                                                                                                      | NA    |
| 22 |                    |                      |                                                                                                                                                                                                                   |       |
| 23 |                    |                      |                                                                                                                                                                                                                   |       |
| 24 |                    |                      |                                                                                                                                                                                                                   |       |
| 25 | Other analyses     | <a href="#">#17</a>  | Report other analyses done—e.g., analyses of subgroups and interactions, and sensitivity analyses                                                                                                                 | NA    |
| 26 |                    |                      |                                                                                                                                                                                                                   |       |
| 27 |                    |                      |                                                                                                                                                                                                                   |       |
| 28 |                    |                      |                                                                                                                                                                                                                   |       |
| 29 | <b>Discussion</b>  |                      |                                                                                                                                                                                                                   |       |
| 30 |                    |                      |                                                                                                                                                                                                                   |       |
| 31 | Key results        | <a href="#">#18</a>  | Summarise key results with reference to study objectives                                                                                                                                                          | 20    |
| 32 |                    |                      |                                                                                                                                                                                                                   |       |
| 33 |                    |                      |                                                                                                                                                                                                                   |       |
| 34 | Limitations        | <a href="#">#19</a>  | Discuss limitations of the study, taking into account sources of potential bias or imprecision. Discuss both direction and magnitude of any potential bias.                                                       | 24    |
| 35 |                    |                      |                                                                                                                                                                                                                   |       |
| 36 |                    |                      |                                                                                                                                                                                                                   |       |
| 37 |                    |                      |                                                                                                                                                                                                                   |       |
| 38 |                    |                      |                                                                                                                                                                                                                   |       |
| 39 | Interpretation     | <a href="#">#20</a>  | Give a cautious overall interpretation considering objectives, limitations, multiplicity of analyses, results from similar studies, and other relevant evidence.                                                  | 20    |
| 40 |                    |                      |                                                                                                                                                                                                                   |       |
| 41 |                    |                      |                                                                                                                                                                                                                   |       |
| 42 |                    |                      |                                                                                                                                                                                                                   |       |
| 43 |                    |                      |                                                                                                                                                                                                                   |       |
| 44 | Generalisability   | <a href="#">#21</a>  | Discuss the generalisability (external validity) of the study results                                                                                                                                             | 21:23 |
| 45 |                    |                      |                                                                                                                                                                                                                   |       |
| 46 |                    |                      |                                                                                                                                                                                                                   |       |
| 47 | <b>Other</b>       |                      |                                                                                                                                                                                                                   |       |
| 48 | <b>Information</b> |                      |                                                                                                                                                                                                                   |       |
| 49 |                    |                      |                                                                                                                                                                                                                   |       |
| 50 |                    |                      |                                                                                                                                                                                                                   |       |
| 51 | Funding            | <a href="#">#22</a>  | Give the source of funding and the role of the funders for the present study and, if applicable, for the original study on which the present article is based                                                     | 3     |
| 52 |                    |                      |                                                                                                                                                                                                                   |       |
| 53 |                    |                      |                                                                                                                                                                                                                   |       |
| 54 |                    |                      |                                                                                                                                                                                                                   |       |
| 55 |                    |                      |                                                                                                                                                                                                                   |       |

The STROBE checklist is distributed under the terms of the Creative Commons Attribution License CC-BY.

This checklist was completed on 23. October 2021 using <https://www.goodreports.org/>, a tool made by the

[EQUATOR Network](#) in collaboration with [Penelope.ai](#)

For peer review only - <http://bmjopen.bmj.com/site/about/guidelines.xhtml>

# BMJ Open

## **Inequalities in the evolution of the COVID-19 pandemic: An ecological study of inequalities in mortality in the first wave and the effects of the first national lockdown in England**

|                                 |                                                                                                                                                                                                                                |
|---------------------------------|--------------------------------------------------------------------------------------------------------------------------------------------------------------------------------------------------------------------------------|
| Journal:                        | <i>BMJ Open</i>                                                                                                                                                                                                                |
| Manuscript ID                   | bmjopen-2021-058658.R1                                                                                                                                                                                                         |
| Article Type:                   | Original research                                                                                                                                                                                                              |
| Date Submitted by the Author:   | 09-Mar-2022                                                                                                                                                                                                                    |
| Complete List of Authors:       | Welsh, Claire; Newcastle University<br>Albani, Viviana; Newcastle University<br>Matthews, Fiona; Newcastle University Faculty of Medical Sciences, Population Health Sciences Institute<br>Bambra, Clare; Newcastle University |
| <b>Primary Subject Heading</b>: | Epidemiology                                                                                                                                                                                                                   |
| Secondary Subject Heading:      | Health policy, Infectious diseases, Public health                                                                                                                                                                              |
| Keywords:                       | COVID-19, Epidemiology < INFECTIOUS DISEASES, Public health < INFECTIOUS DISEASES                                                                                                                                              |
|                                 |                                                                                                                                                                                                                                |

SCHOLARONE™  
Manuscripts



I, the Submitting Author has the right to grant and does grant on behalf of all authors of the Work (as defined in the below author licence), an exclusive licence and/or a non-exclusive licence for contributions from authors who are: i) UK Crown employees; ii) where BMJ has agreed a CC-BY licence shall apply, and/or iii) in accordance with the terms applicable for US Federal Government officers or employees acting as part of their official duties; on a worldwide, perpetual, irrevocable, royalty-free basis to BMJ Publishing Group Ltd ("BMJ") its licensees and where the relevant Journal is co-owned by BMJ to the co-owners of the Journal, to publish the Work in this journal and any other BMJ products and to exploit all rights, as set out in our [licence](#).

The Submitting Author accepts and understands that any supply made under these terms is made by BMJ to the Submitting Author unless you are acting as an employee on behalf of your employer or a postgraduate student of an affiliated institution which is paying any applicable article publishing charge ("APC") for Open Access articles. Where the Submitting Author wishes to make the Work available on an Open Access basis (and intends to pay the relevant APC), the terms of reuse of such Open Access shall be governed by a Creative Commons licence – details of these licences and which [Creative Commons](#) licence will apply to this Work are set out in our licence referred to above.

Other than as permitted in any relevant BMJ Author's Self Archiving Policies, I confirm this Work has not been accepted for publication elsewhere, is not being considered for publication elsewhere and does not duplicate material already published. I confirm all authors consent to publication of this Work and authorise the granting of this licence.

1  
2  
3 1 **Inequalities in the evolution of the COVID-19 pandemic: An ecological study of inequalities in**  
4  
5 2 **mortality in the first wave and the effects of the first national lockdown in England**  
6  
7  
8  
9 3

10  
11 4 **Claire E. Welsh PhD (0000-0001-9477-0775)<sup>1\*</sup>, Viviana Albani (0000-0001-9584-7631)<sup>1</sup>, Fiona E.**  
12  
13 5 **Matthews PhD (0000-0002-1728-2388)<sup>1,2</sup>, Clare Bambra PhD (0000-0002-1294-6851)<sup>1,2</sup>**  
14  
15  
16 6

17  
18  
19 7 <sup>1</sup>Population Health Sciences Institute, Newcastle University, UK, NE4 5PL  
20

21  
22 8 <sup>2</sup> Applied Research Collaboration North East and North Cumbria, Newcastle University, UK, NE4 5PL  
23  
24  
25 9

26  
27  
28 10 \*Corresponding author: [Claire.Welsh@newcastle.ac.uk](mailto:Claire.Welsh@newcastle.ac.uk), Room 2.38 Biomedical Research Building,  
29  
30 11 Campus for Ageing and Vitality, Newcastle University, Newcastle, NE4 5PL.  
31  
32  
33 12  
34  
35  
36 13  
37  
38  
39  
40  
41  
42  
43  
44  
45  
46  
47  
48  
49  
50  
51  
52  
53  
54  
55  
56  
57  
58  
59  
60

1  
2  
3 **14 Conflicts of Interest Statement**  
4  
5

6 **15** All authors have completed the ICMJE uniform disclosure form at [www.icmje.org/coi\\_disclosure.pdf](http://www.icmje.org/coi_disclosure.pdf)  
7  
8 **16** and declare: no financial relationships with any organisations that might have an interest in the  
9  
10 **17** submitted work in the previous three years; no other relationships or activities that could appear to  
11  
12 **18** have influenced the submitted work.  
13  
14

15  
16 **19 Data Sharing Statement**  
17

18 **20** All data used are publicly freely available through the ONS. Code used in the analyses is available  
19  
20 **21** upon request.  
21  
22

23  
24 **22 Ethical Approval**  
25

26 **23** This study was approved by the Newcastle University Ethics Committee (Ref: 7543/2020).  
27  
28

29  
30 **24 Transparency declaration**  
31

32 **25** The lead author\* affirms that this manuscript is an honest, accurate, and transparent account of the  
33  
34 **26** study being reported; that no important aspects of the study have been omitted; and that any  
35  
36 **27** discrepancies from the study as planned (and, if relevant, registered) have been explained.  
37  
38  
39

40 **28**  
41  
42 **29** \*The manuscript's guarantor.  
43  
44  
45

46 **30**  
47  
48 **31 Funding**  
49

50 **32** This work was supported by a grant from The Health Foundation (Ref: 2211473), who took no part in  
51  
52 **33** the design, analysis or writing of this study.  
53  
54  
55

56 **34**  
57  
58 **35 Keywords**  
59  
60

1  
2  
3  
4  
5  
6  
7  
8  
9  
10  
11  
12  
13  
14  
15  
16  
17  
18  
19  
20  
21  
22  
23  
24  
25  
26  
27  
28  
29  
30  
31  
32  
33  
34  
35  
36  
37  
38  
39  
40  
41  
42  
43  
44  
45  
46  
47  
48  
49  
50  
51  
52  
53  
54  
55  
56  
57  
58  
59  
60

36 **COVID-19; geography; inequalities ;mortality;**

37

38

39

For peer review only

## 40 **Strengths and limitations of this study**

- 41 • **This study examines the evolution of inequalities in COVID-19 in the first wave of the**  
42 **pandemic in England and the impact of the national lock down.**
- 43 • **National level official (ONS) data used, covering nearly all local authorities in England and**  
44 **including all deaths that made any mention of COVID-19 on death certificates, requiring**  
45 **sensitive data acquisition.**
- 46 • **Age-standardised deaths rates at lower geographies are not available at the time of**  
47 **writing but could lend extra nuance to these findings.**
- 48 • **Ecological study not using individual level data, so unable to examine the individual level**  
49 **risks for COVID-19 mortality.**

50

## 51 **Abstract**

### 52 **Objectives**

53 To examine how ecological inequalities in COVID-19 mortality rates evolved in England, and whether  
54 the first national lockdown impacted them. This analysis aimed to provide evidence for important  
55 lessons to inform public health planning to reduce inequalities in any future pandemics.

### 56 **Design**

57 Longitudinal ecological study

### 58 **Setting**

59 307 Lower-tier local authorities in England

### 60 **Primary outcome measure**

61 Age-standardised COVID-19 mortality rates by local authority, regressed on Index of Multiple  
62 Deprivation (IMD) and relevant epidemic dynamics.



1  
2  
3 **63 Results**  
4  
5

6 64 Local authorities that started recording COVID-19 deaths earlier were more deprived, and more  
7  
8 65 deprived authorities saw faster increases in their death rates. By 2020-04-06 (week 15, the earliest  
9  
10 66 time that the March 23<sup>rd</sup> lockdown could have begun affecting death rates) the cumulative death  
11  
12 67 rate in local authorities in the two most deprived deciles of Index of Multiple Deprivation (IMD) was  
13  
14 68 54% higher than the rate in the two least deprived deciles. By 2020-07-04 (week 27), this gap had  
15  
16 69 narrowed to 29%. Thus, inequalities in mortality rates by decile of deprivation persisted throughout  
17  
18 70 the first wave, but reduced during the lockdown.  
19  
20  
21

22 **71 Conclusions**  
23  
24

25 72 This study found significant differences in the dynamics of COVID-19 mortality at the local authority  
26  
27 73 level, resulting in inequalities in cumulative mortality rates during the first wave of the pandemic.  
28  
29 74 The first lockdown in England was fairly strict – and the study found that it particularly benefited  
30  
31 75 those living in the more deprived local authorities. Care should be taken to implement lockdowns  
32  
33 76 early enough, in the right places - and at a sufficiently strict level- to maximally benefit all  
34  
35 77 communities, and reduce inequalities.  
36  
37  
38

39 78  
40  
41

42 **79 Word Count:**  
43  
44  
45  
46  
47  
48  
49  
50  
51  
52  
53  
54  
55  
56  
57  
58  
59  
60

## 80 Introduction

81 Since the early days of the SARS-CoV-2 pandemic in 2020, inequalities in case, hospitalisation and  
82 death rates have been noted internationally (1–8). The most deprived populations and areas in the  
83 USA, Europe and other high-income countries (in terms of a range of deprivation measures) have  
84 suffered up to twice the mortality rates of the least deprived sections of society (2,7,9–12). In  
85 addition, inequalities in disease burden have been noted across levels of income, education,  
86 employment, sex, age, and especially between different ethnic groups, where people of Black and  
87 minority ethnic backgrounds have suffered many more cases (and deaths) than their white  
88 counterparts (13). However, the evolution of ecological inequalities in the pandemic over time in  
89 England - and the impact of national lock downs on them – has not previously been examined. This  
90 study addresses this evidence gap by providing the first analysis of inequalities in the evolution of  
91 the pandemic in different English local authorities and the impact of the first national lock down on  
92 them.

93  
94 Most countries employed national lockdowns of varying duration and severity to mitigate disease  
95 spread, alongside social distancing and hygiene-related advice. The factors used to determine when  
96 a lockdown should begin or cease were rarely transparent, but most appeared to reduce infection  
97 rates to some degree after a lag phase, and saw a rebound of varying size following their release  
98 (14–16). The first confirmed cases of COVID-19 were recorded in England in York in January 2020  
99 and the first death in England was on March 5<sup>th</sup>. From 2020-04-23 until 2020-07-04, a national  
100 lockdown was implemented across England. In keeping with many other European countries, this  
101 was characterised by a 12 week ‘stay at home’ order (SI 350) - whereby people could only go outside  
102 for certain "very limited purposes" - to buy food, to exercise once a day, for medical reasons or to  
103 care for a vulnerable person, or to go to work if they absolutely could not work from home (17).  
104 Face-to-face education was suspended and many workplaces closed down - and staff furloughed -

1  
2  
3 105 particularly in the hospitality, travel and retail sectors. As nationally cases, hospitalisation and death  
4  
5 106 rates started to fall the lockdown was gradually released over a period of several months -  
6  
7 107 culminating in the so-called 'Super Saturday' on 2020-07-04 when pubs, restaurants, hairdressers,  
8  
9 108 and cinemas reopened – albeit with strict social distancing rules (18).  
10  
11  
12

13 109

14  
15 110 It has been noted that when national epidemic dynamics are used to examine population health,  
16  
17 111 they can mask important sub-national variation in disease spread, thus mitigation strategies that rely  
18  
19 112 solely on the national data to inform implementation timings could inadvertently worsen health  
20  
21 113 inequalities across geographical areas (14,16). Previous descriptive studies and reports of  
22  
23 114 inequalities in COVID-19 mortality have only focused on cumulative measures over set timespans,  
24  
25 115 without documenting the disparities in evolution of mortality rates (5,19,20), have been restricted to  
26  
27 116 higher geographies (21), or have not focussed on the effects of lockdowns (7,22). An understanding  
28  
29 117 of how the evolution of the pandemic differed by area and the impact of national mitigation  
30  
31 118 strategies on ecological inequalities in COVID-19 mortality could help inform future policies targeted  
32  
33 119 at minimising viral spread whilst preventing the widening (or even actively decreasing) health  
34  
35 120 inequalities.  
36  
37  
38  
39  
40

41 121

42  
43  
44 122 This paper uses COVID-19 mortality data from the first wave of the pandemic in England to provide  
45  
46 123 the first examination of ecological inequalities in the evolution of the pandemic in this country. It  
47  
48 124 sets out the first analysis of when death rates rose, peaked and fell in local authorities of differing  
49  
50 125 levels of deprivation, and it describes the effects – and the timing of - the first national lockdown on  
51  
52 126 these inequalities.  
53  
54

55 127

56  
57  
58 128 **Methods**  
59  
60

1  
2  
3 129 Weekly counts of COVID-19 deaths (based on any mention of Coronavirus on the death certificate)  
4  
5 130 for 312 lower-tier local authorities (excluding county councils) in England were obtained from the  
6  
7 131 Office for National Statistics (ONS) covering the period from 1<sup>st</sup> January 2020 to 4<sup>th</sup> July 2020, by date  
8  
9 132 of registration (local authorities are local government organisations covering variable population  
10  
11 133 sizes from just over 2000 to more than 1.5 million residents (23). Weekly COVID-19 death counts at  
12  
13 134 the local authority level were not available per age group, thus age-standardised rates were  
14  
15 135 calculated via monthly age-standardised rates. Monthly age-standardised COVID-19 mortality rates  
16  
17 136 per local authority for the period March to July 2020 were similarly obtained from ONS (24). The  
18  
19 137 monthly rate was divided between the constituent weeks based on the share of monthly deaths in  
20  
21 138 each week. Where all age-standardised rates for a local authority were suppressed by ONS due to  
22  
23 139 disclosure controls, the authority was excluded from analyses (n=4). The level of deprivation of each  
24  
25 140 local authority was determined by the rank of average rank of the Index of Multiple Deprivation  
26  
27 141 (IMD, a relative measure of deprivation across multiple dimensions at small local area level (25)),  
28  
29 142 which was converted into deciles (decile 1 contained the most deprived 10% of local authorities)  
30  
31 143 from downloaded data (26). In addition, data from the Isles of Scilly and the City of London were  
32  
33 144 excluded due to well-known mortality data quality issues and low population counts.  
34  
35  
36  
37  
38  
39 145  
40  
41  
42 146 A number of metrics were calculated for each local authority; the 'starting week' was the first week  
43  
44 147 where 1 or more COVID-19 deaths were registered, the 'peak' was the highest weekly age-  
45  
46 148 standardised mortality rate per area using a 3-week rolling mean of weekly death rates, and the  
47  
48 149 'total mortality rate' was the cumulative sum of age-standardised weekly mortality rates over the  
49  
50 150 whole study period. The speed of increase was defined as the change in mortality rate between 25%  
51  
52 151 of the peak death rate and the peak rate itself, divided by the number of weeks between them, and  
53  
54 152 similarly the speed of descent was calculated using the peak death rate and subsequent reduction to  
55  
56 153 50% of this peak rate (25 and 50% selected to include time window when epidemic peaks were  
57  
58  
59  
60

1  
2  
3 154 visibly most stable). An assumption was made that any change in population incidence of COVID-19  
4  
5 155 cases may begin to be seen 2 weeks later in mortality data, thus analyses of the effect of lockdown  
6  
7 156 focused on the period before or after week 15 (lockdown was announced in week 13 [March 2020]  
8  
9  
10 157 and ended on 'Super Saturday' [July 4<sup>th</sup>, week 27], which is shown in timeline plots). The 'peak  
11  
12 158 difference' was the difference in weeks between the peak mortality rate and the week in which  
13  
14 159 lockdown began to take effect (week 15).

16  
17 160

18  
19  
20 161 Weekly age-standardised mortality rates per IMD decile (as opposed to per local authority) were not  
21  
22 162 available at the time of writing, thus they were calculated from the age-standardised estimates from  
23  
24 163 the local authority data (please see supplement for more details).

25  
26  
27 164

28  
29  
30 165 Simple linear models were employed to analyse the associations between visually normally  
31  
32 166 distributed measures such as the total cumulative mortality rate with other metrics (e.g. the speed  
33  
34 167 of increase in death rate) and IMD decile. The purpose of these simple models was to understand  
35  
36 168 the relative contribution of deprivation (measured by IMD) and relevant epidemic dynamics (e.g.  
37  
38 169 date of first recorded COVID-19 deaths) to the metric of interest, therefore no model selection was  
39  
40 170 employed, and covariate inclusion was based on empirical knowledge. Any covariates found to fall  
41  
42 171 above the threshold of statistical significance (Wald p-value >0.05 in multivariable models) would be  
43  
44 172 removed from the model (however no covariates needed to be removed in this way). Differences  
45  
46 173 between mean speed of increase or decrease per IMD decile were assessed by non-overlap of 95%  
47  
48 174 confidence intervals.

49  
50  
51  
52  
53 175

54  
55  
56 176 Maps were drawn based on 2020 geographical boundaries from the ONS Open Geography Portal  
57  
58 177 (27).

1  
2  
3 178  
4  
56 179 All analyses were conducted in R statistical software version 3.6.2.  
7  
89 180  
10  
1112 181 **Patient and Public Involvement**  
1314  
15 182 Our public involvement panel inputted into project design and considered the research topic to be of  
16  
17 183 contemporary importance and value. The data used do not require patient permissions for use and  
18  
19 184 are publicly available.  
20  
2122 185  
23  
2425 186 **Results**  
2627  
28 187 All 307 lower-tier local authorities in England began registering deaths involving COVID-19 between  
29  
30 188 weeks 11 and 15. The proportion of areas of each IMD decile per 'starting week' is shown in Figure 1.  
31  
32 189 From this it can be seen that more deprived areas (most deprived decile = 1) tended to begin  
33  
34 190 recording COVID-19 deaths earlier than less deprived areas (least deprived decile = 10).  
35  
3637 191  
38  
3940 192 **Figure 1. Proportion of 312 English local authorities within each IMD decile that began recording**  
41  
42 193 **COVID-19 deaths between weeks 11 and 15 of 2020.**  
43  
4445 194  
46  
4748  
49 195 Figure 2 depicts the weekly mortality rates per 100,000 people for each IMD decile. After the first  
50  
51 196 two weeks of the epidemic, the two most deprived deciles (20% of local authorities) had the highest  
52  
53 197 speed of increase in age-standardised mortality rates and reached higher peak rates than less  
54  
55 198 deprived areas.  
5657  
58 199  
59  
60

1  
2  
3 200 **Figure 2. Weekly age-standardised COVID-19 mortality rates per 100,000 in areas of each IMD**  
4  
5 201 **decile. Dotted line indicates the start of the first national lockdown (26<sup>th</sup> March).**  
6  
7  
8  
9

10  
11  
12  
13  
14  
15  
16  
17  
18  
19  
20  
21  
22  
23  
24  
25  
26  
27  
28  
29  
30

202  
203 From the week of their first COVID-19 deaths to week 15 (when lockdown could plausibly have  
204 begun affecting death rates), local authorities in the two most deprived deciles had the highest  
205 speed of increase in death rate (albeit not statistically significantly different), and the less deprived  
206 deciles increased more slowly (Figure 3). The mean speed of increase in the two most deprived IMD  
207 deciles was 4.03 deaths per 100,000 persons per week, and in the two least deprived deciles was  
208 2.18 deaths per 100,000 persons per week (a difference of 46%).  
209

210  
211  
212  
213  
214

211 **Figure 3. Simple linear gradient of age-standardised COVID-19 death rate per 100,000 people**  
212 **between the first week of recorded COVID-19 deaths and week 15, across rank of average rank of**  
213 **IMD deciles.**  
214

215  
216  
217  
218  
219  
220  
221  
222  
223

215 All local authorities' death rate curves peaked and began to decline between 3 and 10 weeks  
216 following the start of the first lockdown. Those local authorities whose death rates were increasing  
217 faster before lockdown peaked sooner after lockdown commenced compared to slower local  
218 authorities.

219 The total age-standardised cumulative mortality over the first wave (up to week 27, week  
220 commencing 2020-06-28) varied from 119 to 2349 deaths per 100,000 persons per local authority.  
221 Table 1 describes the multivariable linear model of total cumulative death rates per local authority.  
222 It shows that, compared to the most deprived 10% of local authorities, less deprived areas (deciles 3-  
223 10) recorded lower cumulative death rates, and that areas with higher speeds of increase - and more

224 weeks of recorded COVID-19 deaths before lockdown (plus those that peaked later) - saw higher  
225 total death rates.

226

227 **Table 1. Linear multivariable model of the total cumulative age-standardised COVID-19 death rate**  
228 **per 100,000 persons between weeks 1 and 27 of 2020, among 307 local authorities in England.**

| Metric                                                                 | Adjusted Beta Coefficient (SE) | P-value |
|------------------------------------------------------------------------|--------------------------------|---------|
| <b>IMD decile</b>                                                      |                                |         |
| <b>1 (most deprived)</b>                                               | REF                            |         |
| <b>2</b>                                                               | -41.16 (49.30)                 | 0.40    |
| <b>3</b>                                                               | -108.20 (50.46)                | 0.03    |
| <b>4</b>                                                               | -132.11 (49.80)                | 0.008   |
| <b>5</b>                                                               | -140.82 (50.83)                | 0.006   |
| <b>6</b>                                                               | -183.66 (50.64)                | <0.001  |
| <b>7</b>                                                               | -225.06 (50.81)                | <0.001  |
| <b>8</b>                                                               | -170.43 (51.01)                | <0.001  |
| <b>9</b>                                                               | -213.73 (50.82)                | <0.001  |
| <b>10</b>                                                              | -262.16 (50.28)                | <0.001  |
| <b>Speed of increase (to week 15), deaths per 100,000 per week</b>     | 12.87 (0.47)                   | <0.001  |
| <b>Weeks from week of first registered COVID-19 deaths to lockdown</b> | 216.98 (13.04)                 | <0.001  |



|                                        |                |        |
|----------------------------------------|----------------|--------|
| <b>Weeks between peak and lockdown</b> | 104.56 (17.38) | <0.001 |
|----------------------------------------|----------------|--------|

229

230 As mentioned, all local authorities began recording COVID-19 deaths between weeks 11 and 15, i.e.,  
 231 from 2 weeks before the announcement of the first lockdown, to 2 weeks after. The difference in  
 232 total cumulative death rates for areas grouped by starting week are as seen in Table 2.

233

234 **Table 2. Mean cumulative COVID-19 death rate per 100,000 persons over the first wave (weeks 1**  
 235 **to 27, 2020) of the pandemic among 307 local authorities in England.**

| <b>Timing of start week relative to week 13 (when lockdown 1 was announced)</b> | <b>Total cumulative age-standardised COVID-19 death rate per 100,000 persons for whole of wave 1 (weeks 1 to 27, 2020), (SD)</b> | <b>Number of local authorities</b> |
|---------------------------------------------------------------------------------|----------------------------------------------------------------------------------------------------------------------------------|------------------------------------|
| <b>2 weeks before</b>                                                           | 465 (451)                                                                                                                        | 14                                 |
| <b>1 week before</b>                                                            | 780 (324)                                                                                                                        | 124                                |
| <b>Same week</b>                                                                | 984 (407)                                                                                                                        | 101                                |
| <b>1 week after</b>                                                             | 1188 (505)                                                                                                                       | 63                                 |
| <b>2 weeks after</b>                                                            | 1147 (255)                                                                                                                       | 5                                  |

236

237

238 Figure 4 depicts the cumulative COVID-19 death rates of each IMD decile over the whole of the first  
 239 wave. Mortality rates in more deprived areas (deciles 1 and 2) were rising faster than others at the

1  
2  
3 240 start of lockdown (vertical dotted line), and the disparity in cumulative mortality grew as the  
4  
5 241 pandemic progressed.

6  
7  
8 242  
9

10  
11 243 **Figure 4. Cumulative COVID-19 death rates per 100,000 for areas of each IMD decile over the first**  
12  
13 244 **wave of the pandemic in 307 local authorities in England. Dotted line marks timing of the**  
14  
15 245 **announcement of the first lockdown, zoomed in area between weeks 13 and 14.**

16  
17  
18 246  
19  
20

21 247 Up until week 15 when the effects of lockdown may have started to be seen in mortality data, the  
22  
23 248 cumulative death rate per 100,000 persons already differed by IMD decile. The two most deprived  
24  
25 249 deciles recorded 77.16 deaths per 100,000 persons by this time, whereas the two least deprived  
26  
27 250 deciles recorded only 50.01 deaths per 100,000 persons. This inequality reduced by the time the first  
28  
29 251 wave had passed (by week 27), but did not equalise, with the most deprived two deciles recording  
30  
31 252 316.14 total deaths per 100,000 persons, and the least deprived recording 245.10 deaths per 100,00  
32  
33 253 persons. These equate to an excess of 54% before lockdown versus 29% after lockdown.

34  
35  
36 254  
37  
38  
39

40  
41 255 Figure 5 illustrates the geographical distribution of deprivation based on IMD and the total  
42  
43 256 cumulative age-standardised COVID-19 death rate per 100,000 persons over the first wave of the  
44  
45 257 pandemic. London and the North West featured many of the areas with the highest overall death  
46  
47 258 rates. Although these areas featured many deprived local authorities, the distributions were not  
48  
49 259 identical.

50  
51  
52 260  
53  
54

55 261 **Figure 5. Average rank of the index of multiple deprivation (IMD) and total cumulative COVID-19**  
56  
57 262 **death rate per 100,000 persons over the first wave of the pandemic (weeks 1 to 27, 2020) per local**  
58  
59 263 **authority in England.**

1  
2  
3 264  
4  
56 265 **Discussion**  
7

8  
9 266 This study has provided the first examination of the evolution of inequalities in the COVID-19  
10  
11 267 pandemic. It has found that inequalities in COVID-19 mortality rates by deprivation in England began  
12  
13 268 to appear early in the first wave. More deprived local authorities generally started recording COVID-  
14  
15 269 19 deaths earlier than less deprived areas, and mortality rates also increased faster in more deprived  
16  
17 270 areas, and rose to higher peak rates. All of the 307 lower-tier local authorities in England began  
18  
19 271 recording COVID-19 deaths as early as 2 weeks before first national lockdown in England was  
20  
21 272 announced, or up to 2 weeks afterwards, with the latter – less deprived - group of local authorities  
22  
23 273 recording fewer cumulative deaths over the whole of the first wave, compared to the former – more  
24  
25 274 deprived – group of local authorities.  
26  
27  
28  
29

30 275  
31

32 276 The study has also provided the first assessment of the impacts of the first English national lock  
33  
34 277 down on the evolution of the pandemic. It has found that following the implementation of the  
35  
36 278 national lockdown, local authorities where death rates had been rising faster (i.e. more deprived  
37  
38 279 areas), peaked and began to descend earlier than the other – less deprived – local authorities.  
39  
40 280 Cumulative death rates were higher in more deprived areas by the time lockdown began, but the  
41  
42 281 difference narrowed moderately towards the end of the first wave.  
43  
44  
45

46 282  
47  
4849 283  
50  
51

52 284 England imposed a national lockdown during the first wave of the COVID-19 epidemic in March 2020  
53  
54 285 (28). This measure aimed to drastically reduce instances of interpersonal contact between infected  
55  
56 286 individuals (whether symptomatic or not) and the wider susceptible population. Confining the public  
57  
58 287 to their homes, suspending face-to-face education and restricting travel placed great burdens upon  
59  
60

1  
2  
3 288 the health and welfare of many individuals and communities, through a number of pathways that  
4  
5 289 are still being elucidated, and which will continue to emerge (29–31). There is no doubt that the  
6  
7 290 economic implications of such lockdowns can be severe, and disruptions to usual health care  
8  
9 291 provision have led to increased mortality from non-COVID causes (32). However, the risks posed to  
10  
11 292 society of not imposing such lockdowns are likely much greater (33). Unchecked viral spread would  
12  
13 293 lead to mass fatalities, increased disability rates especially in the young from the effects of non-fatal  
14  
15 294 infection (so-called 'Long COVID'(34)), and an increased risk of viral mutation into forms which may  
16  
17 295 pose even greater threat (35). Importantly, the National Health Service (NHS) could potentially be  
18  
19 296 filled beyond capacity with COVID-19 patients, leaving insufficient resources for non-COVID patients  
20  
21 297 of all ages and diagnoses. Economic implications of unchecked viral spread are likely to be  
22  
23 298 considerably worse than those caused by national lockdowns, and could continue for longer due to  
24  
25 299 the likelihood of future outbreaks of mutated viral strains and multiple waves of infection (33). A  
26  
27 300 well-timed national lockdown has the ability to reduce case incidence to low levels at which 'test,  
28  
29 301 trace and isolate' programs can efficiently extinguish local outbreaks, and lends time for mass  
30  
31 302 vaccination to offer protection, especially to the most vulnerable. However, a lockdown that is  
32  
33 303 imposed too late, i.e. when disease incidence is already high and rising, needs to be substantially  
34  
35 304 more stringent and protracted to offer the same slowing effect on case numbers and, subsequently,  
36  
37 305 deaths (33).  
38  
39  
40  
41  
42  
43  
44  
45  
46

47 307 Previous work has focused on comparing COVID-19 mortality rates between areas of England using  
48  
49 308 set time periods without considering the evolution of the inequalities reported (36), or have  
50  
51 309 identified inequalities in case rates and other metrics (16). Using mortality data removes some of  
52  
53 310 the uncertainty surrounding early case ascertainment, since early in the English epidemic, testing  
54  
55 311 was only being performed in hospitals on symptomatic individuals, and so many infections would  
56  
57 312 not have been recorded.  
58  
59  
60

1  
2  
3 313  
4  
5

6 314 It has been noted internationally that the seeding of SARS-CoV-2 into a country tends to be via travel  
7  
8 315 by people at the upper end of the socio-economic spectrum, taking international holidays or  
9  
10 316 travelling for business (37,38). Cases then increase within these less deprived populations until social  
11  
12 317 distancing and national lockdowns are advised or mandated. At this point, the disease burden shifts  
13  
14 318 to the more deprived, who are less able to fully adhere to these guidelines due to less ability to work  
15  
16 319 from home, fewer resources, precarious work, higher population densities and other pre-existing  
17  
18 320 factors (37). These communities may also face barriers to health system access and differences in  
19  
20 321 treatment or care. These two 'phases' of pandemic spread likely apply to COVID-19 cases in  
21  
22 322 England, where the index cases were holidaymakers returning from skiing trips to Austria (39,40).  
23  
24 323 Plümper *et al* (2020) reported that in Germany, despite a somewhat reduced likelihood of infection  
25  
26 324 for those in more deprived areas in the first phase of the epidemic, these communities were  
27  
28 325 nevertheless at similar risk of death. This relative risk of mortality increases for more deprived areas  
29  
30 326 once transmission is established in 'phase 2' of the pandemic – due to population vulnerabilities  
31  
32 327 including poverty, overcrowding and pre-existing chronic conditions (a so-called 'syndemic'  
33  
34 328 pandemic) (41). Our analysis of early-stage mortality in England confirmed this structure, in that  
35  
36 329 mortality rates rose first to a small initial 'peak' in less deprived areas, before being dominated by  
37  
38 330 more deprived local authorities. The earliest data available to the German study began more than 2  
39  
40 331 weeks following the implementation of government lockdowns, whereas the analysis we present  
41  
42 332 here predate the UK lockdown by a number of months, and hence capture the very earliest data  
43  
44 333 available on COVID-19 deaths.  
45  
46  
47  
48  
49

50  
51 334  
52  
53

54 335 We have shown that inequalities in cumulative death rates during the first wave of infection in  
55  
56 336 England existed from the earliest stages of COVID-19 mortality reporting, and were entrenched by  
57  
58 337 differences in the speed of increase, leading to unequal burdens of cumulative mortality at local  
59  
60

1  
2  
3 338 authority level by the time the first national lockdown was called. These inequalities reduced  
4  
5 339 marginally but were not abolished by the national control measures implemented in the lockdown.  
6  
7 340 The first national lockdown in England was fairly strict (e.g. a 'stay at home order') and it was a  
8  
9 341 universal intervention, enforced and applied to the whole population and thereby requiring little by  
10  
11 342 way of individual agency. Previous public health research has shown that such measures are more  
12  
13 343 likely to reduce inequalities in health than those that require individual choice/compliance (42). That  
14  
15 344 the lockdown did not completely eliminate ecological inequalities in COVID-19 mortality may well be  
16  
17 345 as a result of inequalities in (1) *vulnerability* (whereby more deprived areas had a higher burden of  
18  
19 346 clinical risk factors); (2) *susceptibility* (whereby immune response was lower in more deprived  
20  
21 347 populations due to the adverse consequences of long term exposures to harmful living and  
22  
23 348 environmental conditions); (3) *exposure* (inequalities in working conditions notably less ability to  
24  
25 349 work at home in the low income jobs predominating within more deprived local authorities); and (4)  
26  
27 350 *transmission* (higher rates of overcrowding and population density in the community may have  
28  
29 351 impacted on infection spread in more deprived areas (41)).  
30  
31  
32  
33  
34  
35  
36  
37

### 38 353 **Conclusion**

39  
40  
41 354 This study has found that inequalities in death rates during the first wave of infection in England  
42  
43 355 existed from the earliest stages of the COVID-19 pandemic, and were entrenched by differences in  
44  
45 356 the speed of increase. This led to a significant unequal burden in cumulative mortality between the  
46  
47 357 most and least deprived local authorities by the time the first national lockdown was implemented.  
48  
49 358 These inequalities reduced marginally - but were not abolished - during the national lockdown. It is  
50  
51 359 impossible to say with certainty whether an earlier – or longer - national lockdown could have  
52  
53 360 further reduced these inequalities, but it should be noted that, although the lockdown did reverse  
54  
55 361 the trend in mortality rates across the country, it had to do so at more advanced stages of the  
56  
57 362 epidemic in more deprived areas, compounding the unequal disease burden upon these  
58  
59  
60

1  
2  
3 363 communities and local health care systems. Susceptibility to infection and fatality from COVID-19 is  
4  
5 364 undoubtedly closely associated with deprivation, but other factors also play an important part, as  
6  
7 365 well as the stochasticity implicit in viral spread. Nevertheless, our understanding of how deprivation  
8  
9 366 associates with mortality from a novel infectious disease within a virgin population it can help to  
10  
11  
12 367 focus future public health attention on those communities most in need and at risk.  
13  
14  
15 368

### 17 369 **Limitations**

20 370 Weekly age-standardised mortality rates were not available at local authority level at the time of  
21  
22 371 writing. However, we were able to pro rata monthly age-standardised rates to weekly ones using  
23  
24 372 weekly death counts. Age-standardised weekly rates are unlikely to become available at lower  
25  
26 373 geography levels due to disclosure risks. Death counts did not include deaths of non-residents of  
27  
28 374 England, nor where place of residence was unknown, and was based on date of registration rather  
29  
30 375 than date of death.  
31  
32  
33  
34

35 376 Deprivation is undoubtedly linked to COVID-19 mortality, it cannot explain all of the variation in  
36  
37 377 area-level mortality rates, hence COVID-19 mortality and IMD are not perfectly correlated. Many  
38  
39 378 other factors including comorbidity, healthcare provision, employment types and variation in  
40  
41 379 transport links all likely play a part in the causal web linking lockdowns to mortality inequalities. A  
42  
43 380 deeper analysis of these underlying associations was beyond the scope of the current paper, but  
44  
45 381 warrants further scrutiny.  
46  
47  
48

49 382 Testing was limited to hospitalised patients in the earliest months of the pandemic in England. This  
50  
51 383 may have introduced bias to our initial analyses since deaths from COVID-19 may not have been  
52  
53 384 correctly attributed, had the person not received a positive test prior to death. However, we were  
54  
55 385 unable to retrospectively account for this, and it would have applied to a small number of deaths in  
56  
57 386 the earliest time period. Given consistency of trends across areas that began recording deaths at  
58  
59  
60

1  
2  
3 387 different stages of the national pandemic, we do not believe that this would have introduced serious  
4  
5 388 bias.

6  
7  
8 389

9  
10  
11 390

12  
13  
14 391 **Author Statement**

15  
16  
17 392 FM, CB and CW designed the study. CW completed all analyses with input from FM and CB. CW, VA,  
18  
19 393 FM and CB all contributed to drafting the manuscript. The corresponding author attests that all listed  
20  
21 394 authors meet authorship criteria and that no others meeting the criteria have been omitted. CW is  
22  
23 395 guarantor of the analysis.

24  
25  
26 396 The Corresponding Author has the right to grant on behalf of all authors and does grant on behalf of  
27  
28 397 all authors, a worldwide licence to the Publishers and its licensees in perpetuity, in all forms, formats  
29  
30 398 and media (whether known now or created in the future), to i) publish, reproduce, distribute, display  
31  
32 399 and store the Contribution, ii) translate the Contribution into other languages, create adaptations,  
33  
34 400 reprints, include within collections and create summaries, extracts and/or, abstracts of the  
35  
36 401 Contribution, iii) create any other derivative work(s) based on the Contribution, iv) to exploit all  
37  
38 402 subsidiary rights in the Contribution, v) the inclusion of electronic links from the Contribution to  
39  
40 403 third party material where-ever it may be located; and, vi) licence any third party to do any or all of  
41  
42 404 the above.

43  
44  
45  
46  
47 405

48  
49  
50 406 **References**

- 51  
52  
53 407 1. Pillai J, Motloba P, Motaung KSC, Ozougwu LU, Ikalafeng BK, Marinda E, et al. The effect of  
54 408 lockdown regulations on SARS-CoV-2 infectivity in Gauteng Province, South Africa. South  
55 409 African Medical Journal. 2020;110(11):1119–23.
- 56  
57 410 2. Chen JT, Krieger N. Revealing the unequal burden of COVID-19 by income, race/ethnicity, and  
58 411 household crowding: US county versus zip code analyses. Journal of Public Health  
59 412 Management and Practice. 2021;27(1):S46–56.



- 1  
2  
3 413 3. Laster Pirtle WN. Racial Capitalism: A Fundamental Cause of Novel Coronavirus (COVID-19)  
4 414 Pandemic Inequities in the United States. *Health Education and Behavior*. 2020;
- 5  
6 415 4. van Barneveld K, Quinlan M, Kriesler P, Junor A, Baum F, Chowdhury A, et al. The COVID-19  
7 416 pandemic: Lessons on building more equal and sustainable societies. *Economic and Labour*  
8 417 *Relations Review*. 2020;
- 9  
10 418 5. Nazroo J, Becares L. Evidence for ethnic inequalities in mortality related to COVID-19  
11 419 infections: Findings from an ecological analysis of England and Wales. *medRxiv*. 2020;
- 12  
13 420 6. Roxo L, Bambra C, Perelman J. Gender Equality and Gender Inequalities in Self-Reported  
14 421 Health: A Longitudinal Study of 27 European Countries 2004 to 2016. *International Journal of*  
15 422 *Health Services*. 2020;1–9.
- 16  
17 423 7. Public Health England. Disparities in the risk and outcomes of COVID-19. 2020;89. Available  
18 424 from: [https://www.gov.uk/government/publications/covid-19-review-of-disparities-in-risks-](https://www.gov.uk/government/publications/covid-19-review-of-disparities-in-risks-and-outcomes)  
19 425 [and-outcomes](https://www.gov.uk/government/publications/covid-19-review-of-disparities-in-risks-and-outcomes)
- 20  
21 426 8. Dahal S, Luo R, Swahn MH, Chowell G. Geospatial Variability in Excess Death Rates during the  
22 427 COVID-19 Pandemic in Mexico: Examining Socio Demographic, Climate and Population Health  
23 428 Characteristics. *International Journal of Infectious Diseases* [Internet]. 2021;113:347–54.  
24 429 Available from: <https://doi.org/10.1016/j.ijid.2021.10.024>
- 25  
26 430 9. Baena-Diéz JM, Barroso M, Cordeiro-Coelho SI, Díaz JL, Grau M. Impact of COVID-19 outbreak  
27 431 by income: Hitting hardest the most deprived. *Journal of Public Health (United Kingdom)*.  
28 432 2020;42(4):698–703.
- 29  
30 433 10. Benita F, Gasca-Sanchez F. The main factors influencing COVID-19 spread and deaths in  
31 434 Mexico: A comparison between phases I and II. *Applied Geography* [Internet].  
32 435 2021;134(July):102523. Available from: <https://doi.org/10.1016/j.apgeog.2021.102523>
- 33  
34 436 11. Martines MR, Ferreira R v., Toppa RH, Assunção LM, Desjardins MR, Delmelle EM. Detecting  
35 437 space–time clusters of COVID-19 in Brazil: mortality, inequality, socioeconomic vulnerability,  
36 438 and the relative risk of the disease in Brazilian municipalities. *Journal of Geographical*  
37 439 *Systems*. 2021;23(1):7–36.
- 38  
39 440 12. Franch-Pardo I, Desjardins MR, Barea-Navarro I, Cerdà A. A review of GIS methodologies to  
40 441 analyze the dynamics of COVID-19 in the second half of 2020. *Transactions in GIS*.  
41 442 2021;25(5):2191–239.
- 42  
43 443 13. Katikireddi SV, Lal S, Carrol ED, Niedzwiedz CL, Khunti K, Dundas R, et al. Unequal impact of  
44 444 the COVID-19 crisis on minority ethnic groups: A framework for understanding and  
45 445 addressing inequalities. *Journal of Epidemiology and Community Health*. 2021;75(10):970–4.
- 46  
47 446 14. Salvatore M, Basu D, Ray D, Kleinsasser M, Purkayastha S, Bhattacharyya R, et al.  
48 447 Comprehensive public health evaluation of lockdown as a non-pharmaceutical intervention  
49 448 on COVID-19 spread in India: National trends masking state-level variations. *BMJ Open*.  
50 449 2020;10(12).
- 51  
52 450 15. Desvars-Larrive A, Dervic E, Haug N, Niederkrotenthaler T, Chen J, di Natale A, et al. A  
53 451 structured open dataset of government interventions in response to COVID-19. *Scientific*  
54 452 *Data*. 2020;7(1):1–9.

1  
2  
3  
4  
5  
6  
7  
8  
9  
10  
11  
12  
13  
14  
15  
16  
17  
18  
19  
20  
21  
22  
23  
24  
25  
26  
27  
28  
29  
30  
31  
32  
33  
34  
35  
36  
37  
38  
39  
40  
41  
42  
43  
44  
45  
46  
47  
48  
49  
50  
51  
52  
53  
54  
55  
56  
57  
58  
59  
60

- 453 16. Morrissey K, Spooner F, Salter J, Shaddick G. Area level deprivation and monthly COVID-19 cases: The impact of government policy in England. *Social Science & Medicine* [Internet]. 2021;289(September):114413. Available from: <https://doi.org/10.1016/j.socscimed.2021.114413>
- 454  
455  
456
- 457 17. HM Government. The Health Protection (Coronavirus, Restrictions) (No. 2) (England) Regulations 2020 [Internet]. SI2020/684. 2020 [cited 2021 Feb 23]. Available from: <https://www.legislation.gov.uk/uksi/2020/684/contents/made>
- 458  
459
- 460 18. HM Government. The Health Protection (Coronavirus, Restrictions) (England) Regulations 2020 [Internet]. SI 350. 2020 [cited 2021 Feb 23]. Available from: <https://www.legislation.gov.uk/uksi/2020/350/contents/made>
- 461  
462
- 463 19. Sun Y, Hu X, Xie J. Spatial inequalities of COVID-19 mortality rate in relation to socioeconomic and environmental factors across England. *Science of the Total Environment*. 2021;758(January).
- 464  
465
- 466 20. Platt L, Warwick R. COVID-19 and Ethnic Inequalities in England and Wales\*. *Fiscal Studies*. 2020;41(2):259–89.
- 467
- 468 21. Timson A. What geographic inequalities in COVID-19 mortality rates and health can tell us about levelling up | The Health Foundation. The Health Foundation [Internet]. 2021;(July). Available from: <https://www.health.org.uk/news-and-comment/charts-and-infographics/what-geographic-inequalities-in-covid-19-mortality-rates-can-tell-us-about-levelling-up>
- 469  
470  
471  
472
- 473 22. Griffith GJ, Davey Smith G, Manley D, Howe LD, Owen G. Interrogating structural inequalities in COVID-19 mortality in England and Wales. *Journal of Epidemiology and Community Health*. 2021;1–7.
- 474  
475
- 476 23. Office for National Statistics. Analysis of death registrations not involving coronavirus (COVID-19), England and Wales: 28 December 2019 to 1 May 2020. 2020.
- 477
- 478 24. ONS. Deaths due to COVID-19 by local area and deprivation [Internet]. 2021. Available from: <https://www.ons.gov.uk/peoplepopulationandcommunity/birthsdeathsandmarriages/deaths/datasets/deathsduetocovid19bylocalareaanddeprivation>
- 479  
480
- 481 25. Ministry of Housing Communities & Local Government. English Indices of Deprivation 2019 - Summaries at Local Authority Level [Internet]. Open Data. 2019. Available from: <http://opendatacommunities.org/data/societal-wellbeing/imd2019/indicesbyla>
- 482  
483
- 484 26. Ministry of Housing C& LG. English indices of deprivation [Internet]. 2020. Available from: <https://www.gov.uk/government/statistics/english-indices-of-deprivation-2019>
- 485
- 486 27. Office for National Statistics. Local Authority Districts (December 2019) Boundaries UK BUC. Open Geography Portal [Internet]. Available from: <https://geoportal.statistics.gov.uk/datasets/local-authority-districts-december-2019-boundaries-uk-buc>
- 487  
488  
489
- 490 28. BBC News. Coronavirus: Strict new curbs on life in UK announced by PM [Internet]. 2020. Available from: <https://www.bbc.co.uk/news/uk-52012432>
- 491
- 492 29. Richardson DL, Duncan MJ, Clarke ND, Myers TD, Tallis J. The influence of COVID-19 measures in the United Kingdom on physical activity levels, perceived physical function and mood in
- 493

- 1  
2  
3 494 older adults: A survey-based observational study. *Journal of Sports Sciences* [Internet].  
4 495 2020;00(00):1–13. Available from: <https://doi.org/10.1080/02640414.2020.1850984>
- 6 496 30. Ball S, Banerjee A, Berry C, Boyle JR, Bray B, Bradlow W, et al. Monitoring indirect impact of  
7 497 COVID-19 pandemic on services for cardiovascular diseases in the UK. *Heart*.  
8 498 2020;106(24):1890–7.
- 10 499 31. Henry N, Parthiban S, Farroha A. The effect of COVID-19 lockdown on the incidence of  
11 500 deliberate self-harm injuries presenting to the emergency room. *International Journal of*  
12 501 *Psychiatry in Medicine*. 2020;1–12.
- 15 502 32. Vandoros S. Excess mortality during the Covid-19 pandemic: Early evidence from England and  
16 503 Wales. *Social Science and Medicine* [Internet]. 2020;258(June):113101. Available from:  
17 504 <https://doi.org/10.1016/j.socscimed.2020.113101>
- 19 505 33. Balmford B, Annan JD, Hargreaves JC, Altoè M, Bateman IJ. Cross-Country Comparisons of  
20 506 Covid-19: Policy, Politics and the Price of Life. *Environmental and Resource Economics*  
21 507 [Internet]. 2020;76(4):525–51. Available from: <https://doi.org/10.1007/s10640-020-00466-5>
- 23 508 34. Iacobucci G. Long covid: Damage to multiple organs presents in young, low risk patients. *Bmj*.  
24 509 2020;m4470.
- 26 510 35. European Centre for Disease Prevention and Control. Risk related to the spread of new SARS-  
27 511 CoV-2 variants of concern in the EU/EEA-first update. 2021;(January):29. Available from:  
28 512 [https://beta.microreact.org/project/r8vBmatkC9mcfRJ6bUtNr-cog-uk-2021-01-09-sars-cov-](https://beta.microreact.org/project/r8vBmatkC9mcfRJ6bUtNr-cog-uk-2021-01-09-sars-cov-2-in-the-uk/)  
29 513 [2-in-the-uk/](https://beta.microreact.org/project/r8vBmatkC9mcfRJ6bUtNr-cog-uk-2021-01-09-sars-cov-2-in-the-uk/)
- 32 514 36. ONS. Coronavirus (COVID-19) Infection Survey, UK: 16 July 2021 [Internet]. 2021. Available  
33 515 from:  
34 516 [https://www.ons.gov.uk/peoplepopulationandcommunity/healthandsocialcare/conditionsan](https://www.ons.gov.uk/peoplepopulationandcommunity/healthandsocialcare/conditionsanddiseases/bulletins/coronaviruscovid19infectionsurveyypilot/16july2021)  
35 517 [ddiseases/bulletins/coronaviruscovid19infectionsurveyypilot/16july2021](https://www.ons.gov.uk/peoplepopulationandcommunity/healthandsocialcare/conditionsanddiseases/bulletins/coronaviruscovid19infectionsurveyypilot/16july2021)
- 37 518 37. Plümper T, Neumayer E. The pandemic predominantly hits poor neighbourhoods? SARS-CoV-  
38 519 2 infections and COVID-19 fatalities in German districts. *European journal of public health*.  
39 520 2020;30(6):1176–80.
- 42 521 38. Clouston SAP, Natale G, Link BG. Socioeconomic inequalities in the spread of coronavirus-19  
43 522 in the United States: A examination of the emergence of social inequalities. *Social Science*  
44 523 *and Medicine* [Internet]. 2021;268(November 2020):113554. Available from:  
45 524 <https://doi.org/10.1016/j.socscimed.2020.113554>
- 47 525 39. Wikipedia. COVID-19 pandemic in the United Kingdom [Internet]. [cited 2021 Feb 4].  
48 526 Available from: [https://en.wikipedia.org/wiki/COVID-19\\_pandemic\\_in\\_the\\_United\\_Kingdom](https://en.wikipedia.org/wiki/COVID-19_pandemic_in_the_United_Kingdom)
- 50 527 40. Correa-Martínez CL, Kampmeier S, Kümpers P, Schwierzeck V, Hennies M, Hafezi W, et al. A  
51 528 pandemic in times of global tourism: Superspreading and exportation of COVID-19 cases from  
52 529 a ski area in Austria. *Journal of Clinical Microbiology*. 2020;58(6):19–21.
- 54 530 41. Bambra C, Riordan R, Ford J, Matthews F. The COVID-19 pandemic and health inequalities.  
55 531 *Journal of Epidemiology and Community Health*. 2020;74(11):964–8.
- 57 532 42. Adams J, Mytton O, White M, Monsivais P. Why Are Some Population Interventions for Diet  
58 533 and Obesity More Equitable and Effective Than Others? The Role of Individual Agency. *PLoS*  
59 534 *Medicine*. 2016;13(4):1–7.

1  
2  
3  
4  
5  
6  
7  
8  
9  
10  
11  
12  
13  
14  
15  
16  
17  
18  
19  
20  
21  
22  
23  
24  
25  
26  
27  
28  
29  
30  
31  
32  
33  
34  
35  
36  
37  
38  
39  
40  
41  
42  
43  
44  
45  
46  
47  
48  
49  
50  
51  
52  
53  
54  
55  
56  
57  
58  
59  
60

535

For peer review only

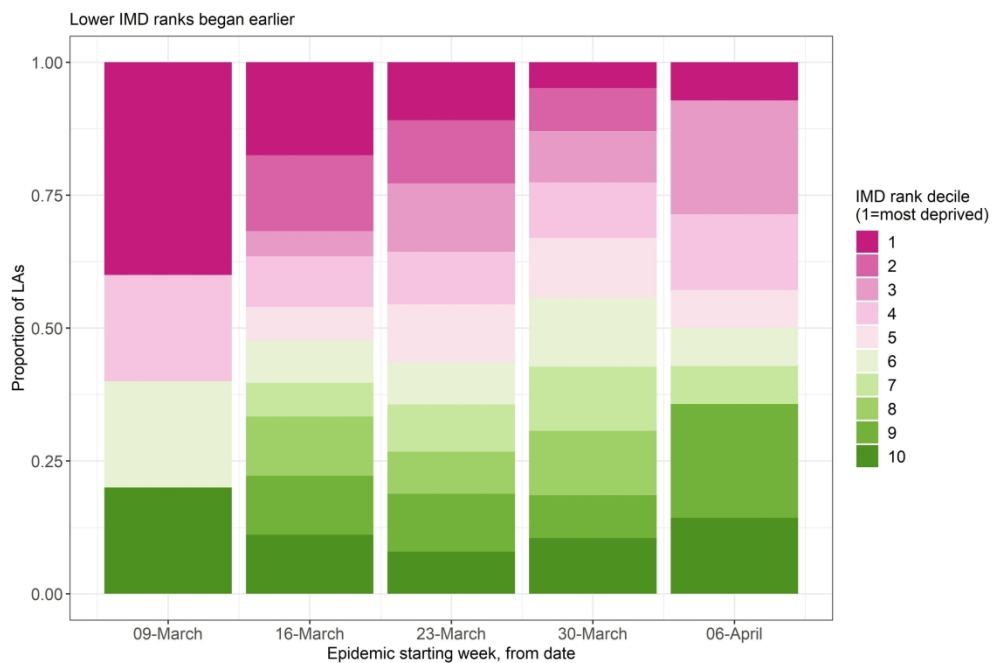

Figure 1. Proportion of 312 English local authorities within each IMD decile that began recording COVID-19 deaths between weeks 11 and 15 of 2020.

255x170mm (300 x 300 DPI)

1  
2  
3  
4  
5  
6  
7  
8  
9  
10  
11  
12  
13  
14  
15  
16  
17  
18  
19  
20  
21  
22  
23  
24  
25  
26  
27  
28  
29  
30  
31  
32  
33  
34  
35  
36  
37  
38  
39  
40  
41  
42  
43  
44  
45  
46  
47  
48  
49  
50  
51  
52  
53  
54  
55  
56  
57  
58  
59  
60

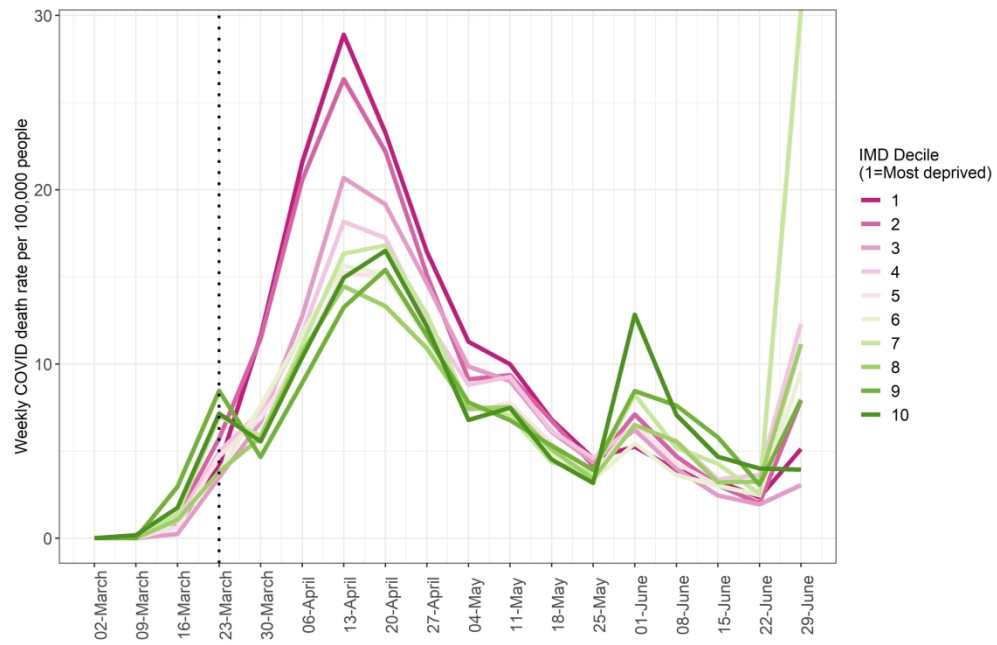

Figure 2. Weekly age-standardised COVID-19 mortality rates per 100,000 in areas of each IMD decile. Dotted line indicates the start of the first national lockdown (26th March).

255x170mm (300 x 300 DPI)

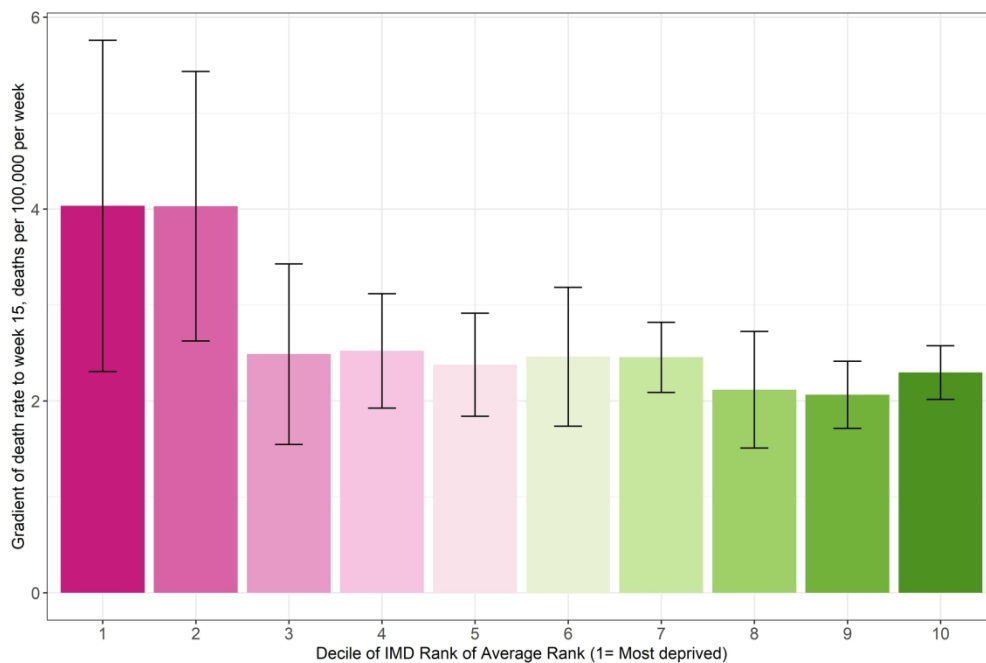

Figure 3. Simple linear gradient of age-standardised COVID-19 death rate per 100,000 people between the first week of recorded COVID-19 deaths and week 15, across rank of average rank of IMD deciles.

255x170mm (300 x 300 DPI)

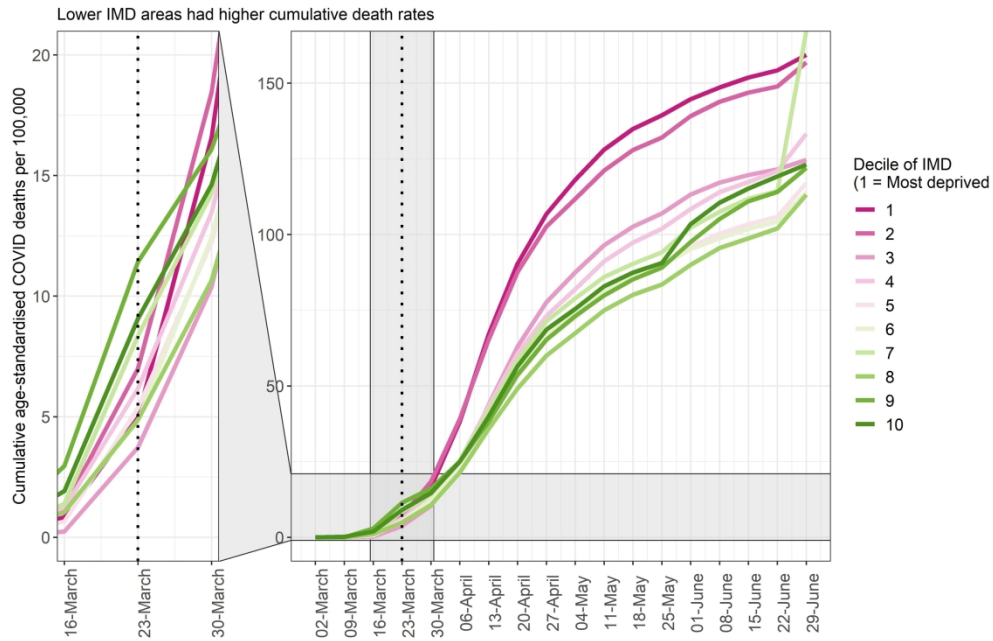

Figure 4. Cumulative COVID-19 death rates per 100,000 for areas of each IMD decile over the first wave of the pandemic in 307 local authorities in England. Dotted line marks timing of the announcement of the first lockdown, zoomed in area between weeks 13 and 14.

255x170mm (300 x 300 DPI)



1  
2  
3  
4  
5  
6  
7  
8  
9  
10  
11  
12  
13  
14  
15  
16  
17  
18  
19  
20  
21  
22  
23  
24  
25  
26  
27  
28  
29  
30  
31  
32  
33  
34  
35  
36  
37  
38  
39  
40  
41  
42  
43  
44  
45  
46  
47  
48  
49  
50  
51  
52  
53  
54  
55  
56  
57  
58  
59  
60

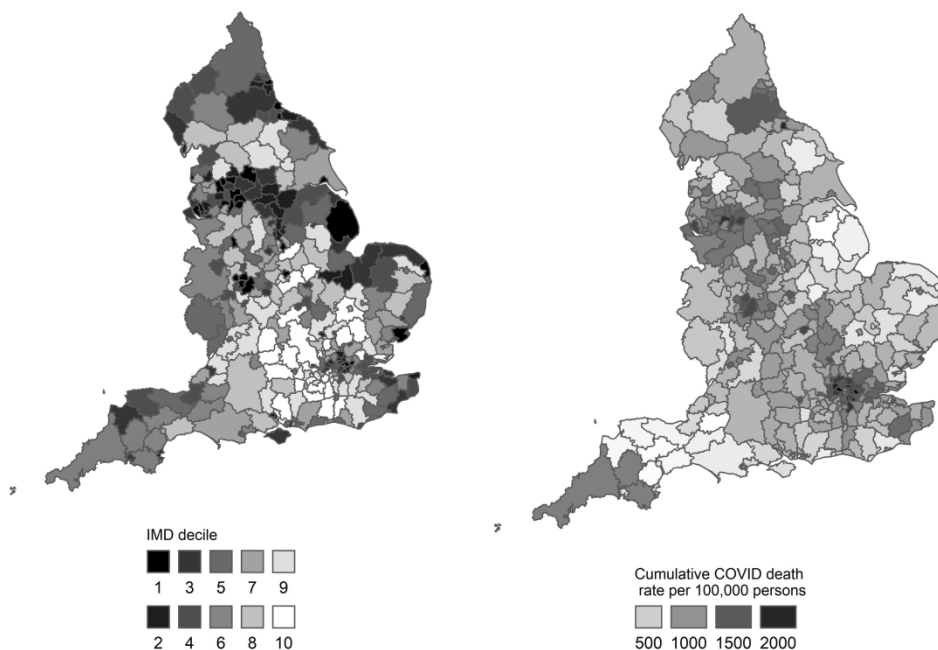

Figure 5. Average rank of the index of multiple deprivation (IMD) and total cumulative COVID-19 death rate per 100,000 persons over the first wave of the pandemic (weeks 1 to 27, 2020) per local authority in England.

255x170mm (300 x 300 DPI)

### Supplemental material

#### S1. Supplementary methods.

**Weekly age-standardised mortality rates per IMD decile (as opposed to per local authority) were not available at the time of writing, thus they were calculated from other existing data, in a similar but distinct method from local authority rates. This method is as follows: Firstly, the denominators from local authority-level monthly age standardised mortality rates were calculated using the death counts and rates provided. These 'age-standardised' population estimates were summed across local authorities within the same IMD decile, and counts of COVID-19 deaths were similarly summed by decile. Weekly age-standardised rates per 100,000 people were then calculated as the sum of deaths divided by the modified summed population estimate, multiplied by 100,000.**

# Reporting checklist for cross sectional study.

Based on the STROBE cross sectional guidelines.

## Instructions to authors

Complete this checklist by entering the page numbers from your manuscript where readers will find each of the items listed below.

Your article may not currently address all the items on the checklist. Please modify your text to include the missing information. If you are certain that an item does not apply, please write "n/a" and provide a short explanation.

Upload your completed checklist as an extra file when you submit to a journal.

In your methods section, say that you used the STROBE cross sectional reporting guidelines, and cite them as:

von Elm E, Altman DG, Egger M, Pocock SJ, Gøtzsche PC, Vandenbroucke JP. The Strengthening the Reporting of Observational Studies in Epidemiology (STROBE) Statement: guidelines for reporting observational studies.

|                           |                     | Reporting Item                                                                                  | Page Number |
|---------------------------|---------------------|-------------------------------------------------------------------------------------------------|-------------|
| <b>Title and abstract</b> |                     |                                                                                                 |             |
| Title                     | <a href="#">#1a</a> | Indicate the study's design with a commonly used term in the title or the abstract              | 1           |
| Abstract                  | <a href="#">#1b</a> | Provide in the abstract an informative and balanced summary of what was done and what was found | 5           |
| <b>Introduction</b>       |                     |                                                                                                 |             |
| Background / rationale    | <a href="#">#2</a>  | Explain the scientific background and rationale for the investigation being reported            | 7,8         |
| Objectives                | <a href="#">#3</a>  | State specific objectives, including any prespecified hypotheses                                | 8           |
| <b>Methods</b>            |                     |                                                                                                 |             |
| Study design              | <a href="#">#4</a>  | Present key elements of study design early in the paper                                         | 9           |
| Setting                   | <a href="#">#5</a>  | Describe the setting, locations, and relevant dates, including periods of                       | 9,10        |

recruitment, exposure, follow-up, and data collection

|    |                      |                      |                                                                                                                                                                                                                                                                                |      |
|----|----------------------|----------------------|--------------------------------------------------------------------------------------------------------------------------------------------------------------------------------------------------------------------------------------------------------------------------------|------|
| 1  |                      |                      |                                                                                                                                                                                                                                                                                |      |
| 2  |                      |                      |                                                                                                                                                                                                                                                                                |      |
| 3  | Eligibility criteria | <a href="#">#6a</a>  | Give the eligibility criteria, and the sources and methods of selection of participants.                                                                                                                                                                                       | NA   |
| 4  |                      |                      |                                                                                                                                                                                                                                                                                |      |
| 5  |                      |                      |                                                                                                                                                                                                                                                                                |      |
| 6  |                      | <a href="#">#7</a>   | Clearly define all outcomes, exposures, predictors, potential confounders, and effect modifiers. Give diagnostic criteria, if applicable                                                                                                                                       | 9,10 |
| 7  |                      |                      |                                                                                                                                                                                                                                                                                |      |
| 8  |                      |                      |                                                                                                                                                                                                                                                                                |      |
| 9  |                      |                      |                                                                                                                                                                                                                                                                                |      |
| 10 | Data sources /       | <a href="#">#8</a>   | For each variable of interest give sources of data and details of methods of assessment (measurement). Describe comparability of assessment methods if there is more than one group. Give information separately for for exposed and unexposed groups if applicable.           | 9,10 |
| 11 | measurement          |                      |                                                                                                                                                                                                                                                                                |      |
| 12 |                      |                      |                                                                                                                                                                                                                                                                                |      |
| 13 |                      |                      |                                                                                                                                                                                                                                                                                |      |
| 14 |                      |                      |                                                                                                                                                                                                                                                                                |      |
| 15 |                      |                      |                                                                                                                                                                                                                                                                                |      |
| 16 |                      |                      |                                                                                                                                                                                                                                                                                |      |
| 17 | Bias                 | <a href="#">#9</a>   | Describe any efforts to address potential sources of bias                                                                                                                                                                                                                      | 9,10 |
| 18 |                      |                      |                                                                                                                                                                                                                                                                                |      |
| 19 | Study size           | <a href="#">#10</a>  | Explain how the study size was arrived at                                                                                                                                                                                                                                      | NA   |
| 20 |                      |                      |                                                                                                                                                                                                                                                                                |      |
| 21 | Quantitative         | <a href="#">#11</a>  | Explain how quantitative variables were handled in the analyses. If applicable, describe which groupings were chosen, and why                                                                                                                                                  | 9,10 |
| 22 | variables            |                      |                                                                                                                                                                                                                                                                                |      |
| 23 |                      |                      |                                                                                                                                                                                                                                                                                |      |
| 24 |                      |                      |                                                                                                                                                                                                                                                                                |      |
| 25 | Statistical          | <a href="#">#12a</a> | Describe all statistical methods, including those used to control for confounding                                                                                                                                                                                              | 10   |
| 26 | methods              |                      |                                                                                                                                                                                                                                                                                |      |
| 27 |                      |                      |                                                                                                                                                                                                                                                                                |      |
| 28 |                      |                      |                                                                                                                                                                                                                                                                                |      |
| 29 | Statistical          | <a href="#">#12b</a> | Describe any methods used to examine subgroups and interactions                                                                                                                                                                                                                | NA   |
| 30 | methods              |                      |                                                                                                                                                                                                                                                                                |      |
| 31 |                      |                      |                                                                                                                                                                                                                                                                                |      |
| 32 |                      |                      |                                                                                                                                                                                                                                                                                |      |
| 33 | Statistical          | <a href="#">#12c</a> | Explain how missing data were addressed                                                                                                                                                                                                                                        | NA   |
| 34 | methods              |                      |                                                                                                                                                                                                                                                                                |      |
| 35 |                      |                      |                                                                                                                                                                                                                                                                                |      |
| 36 |                      |                      |                                                                                                                                                                                                                                                                                |      |
| 37 | Statistical          | <a href="#">#12d</a> | If applicable, describe analytical methods taking account of sampling strategy                                                                                                                                                                                                 | 9,10 |
| 38 | methods              |                      |                                                                                                                                                                                                                                                                                |      |
| 39 |                      |                      |                                                                                                                                                                                                                                                                                |      |
| 40 |                      |                      |                                                                                                                                                                                                                                                                                |      |
| 41 | Statistical          | <a href="#">#12e</a> | Describe any sensitivity analyses                                                                                                                                                                                                                                              | NA   |
| 42 | methods              |                      |                                                                                                                                                                                                                                                                                |      |
| 43 |                      |                      |                                                                                                                                                                                                                                                                                |      |
| 44 | <b>Results</b>       |                      |                                                                                                                                                                                                                                                                                |      |
| 45 |                      |                      |                                                                                                                                                                                                                                                                                |      |
| 46 | Participants         | <a href="#">#13a</a> | Report numbers of individuals at each stage of study—eg numbers potentially eligible, examined for eligibility, confirmed eligible, included in the study, completing follow-up, and analysed. Give information separately for for exposed and unexposed groups if applicable. | 11   |
| 47 |                      |                      |                                                                                                                                                                                                                                                                                |      |
| 48 |                      |                      |                                                                                                                                                                                                                                                                                |      |
| 49 |                      |                      |                                                                                                                                                                                                                                                                                |      |
| 50 |                      |                      |                                                                                                                                                                                                                                                                                |      |
| 51 |                      |                      |                                                                                                                                                                                                                                                                                |      |
| 52 |                      |                      |                                                                                                                                                                                                                                                                                |      |
| 53 |                      |                      |                                                                                                                                                                                                                                                                                |      |
| 54 |                      |                      |                                                                                                                                                                                                                                                                                |      |
| 55 | Participants         | <a href="#">#13b</a> | Give reasons for non-participation at each stage                                                                                                                                                                                                                               | NA   |
| 56 |                      |                      |                                                                                                                                                                                                                                                                                |      |
| 57 | Participants         | <a href="#">#13c</a> | Consider use of a flow diagram                                                                                                                                                                                                                                                 | NA   |
| 58 |                      |                      |                                                                                                                                                                                                                                                                                |      |
| 59 |                      |                      |                                                                                                                                                                                                                                                                                |      |
| 60 |                      |                      |                                                                                                                                                                                                                                                                                |      |

|    |                    |                      |                                                                                                                                                                                                                   |       |
|----|--------------------|----------------------|-------------------------------------------------------------------------------------------------------------------------------------------------------------------------------------------------------------------|-------|
| 1  | Descriptive data   | <a href="#">#14a</a> | Give characteristics of study participants (eg demographic, clinical, social) and information on exposures and potential confounders. Give information separately for exposed and unexposed groups if applicable. | 11    |
| 2  |                    |                      |                                                                                                                                                                                                                   |       |
| 3  |                    |                      |                                                                                                                                                                                                                   |       |
| 4  |                    |                      |                                                                                                                                                                                                                   |       |
| 5  |                    |                      |                                                                                                                                                                                                                   |       |
| 6  | Descriptive data   | <a href="#">#14b</a> | Indicate number of participants with missing data for each variable of interest                                                                                                                                   | 11    |
| 7  |                    |                      |                                                                                                                                                                                                                   |       |
| 8  |                    |                      |                                                                                                                                                                                                                   |       |
| 9  |                    |                      |                                                                                                                                                                                                                   |       |
| 10 | Outcome data       | <a href="#">#15</a>  | Report numbers of outcome events or summary measures. Give information separately for exposed and unexposed groups if applicable.                                                                                 | 11    |
| 11 |                    |                      |                                                                                                                                                                                                                   |       |
| 12 |                    |                      |                                                                                                                                                                                                                   |       |
| 13 |                    |                      |                                                                                                                                                                                                                   |       |
| 14 | Main results       | <a href="#">#16a</a> | Give unadjusted estimates and, if applicable, confounder-adjusted estimates and their precision (eg, 95% confidence interval). Make clear which confounders were adjusted for and why they were included          | NA    |
| 15 |                    |                      |                                                                                                                                                                                                                   |       |
| 16 |                    |                      |                                                                                                                                                                                                                   |       |
| 17 |                    |                      |                                                                                                                                                                                                                   |       |
| 18 |                    |                      |                                                                                                                                                                                                                   |       |
| 19 | Main results       | <a href="#">#16b</a> | Report category boundaries when continuous variables were categorized                                                                                                                                             | NA    |
| 20 |                    |                      |                                                                                                                                                                                                                   |       |
| 21 | Main results       | <a href="#">#16c</a> | If relevant, consider translating estimates of relative risk into absolute risk for a meaningful time period                                                                                                      | NA    |
| 22 |                    |                      |                                                                                                                                                                                                                   |       |
| 23 |                    |                      |                                                                                                                                                                                                                   |       |
| 24 |                    |                      |                                                                                                                                                                                                                   |       |
| 25 | Other analyses     | <a href="#">#17</a>  | Report other analyses done—e.g., analyses of subgroups and interactions, and sensitivity analyses                                                                                                                 | NA    |
| 26 |                    |                      |                                                                                                                                                                                                                   |       |
| 27 |                    |                      |                                                                                                                                                                                                                   |       |
| 28 |                    |                      |                                                                                                                                                                                                                   |       |
| 29 | <b>Discussion</b>  |                      |                                                                                                                                                                                                                   |       |
| 30 |                    |                      |                                                                                                                                                                                                                   |       |
| 31 | Key results        | <a href="#">#18</a>  | Summarise key results with reference to study objectives                                                                                                                                                          | 20    |
| 32 |                    |                      |                                                                                                                                                                                                                   |       |
| 33 |                    |                      |                                                                                                                                                                                                                   |       |
| 34 | Limitations        | <a href="#">#19</a>  | Discuss limitations of the study, taking into account sources of potential bias or imprecision. Discuss both direction and magnitude of any potential bias.                                                       | 24    |
| 35 |                    |                      |                                                                                                                                                                                                                   |       |
| 36 |                    |                      |                                                                                                                                                                                                                   |       |
| 37 |                    |                      |                                                                                                                                                                                                                   |       |
| 38 |                    |                      |                                                                                                                                                                                                                   |       |
| 39 | Interpretation     | <a href="#">#20</a>  | Give a cautious overall interpretation considering objectives, limitations, multiplicity of analyses, results from similar studies, and other relevant evidence.                                                  | 20    |
| 40 |                    |                      |                                                                                                                                                                                                                   |       |
| 41 |                    |                      |                                                                                                                                                                                                                   |       |
| 42 |                    |                      |                                                                                                                                                                                                                   |       |
| 43 |                    |                      |                                                                                                                                                                                                                   |       |
| 44 | Generalisability   | <a href="#">#21</a>  | Discuss the generalisability (external validity) of the study results                                                                                                                                             | 21:23 |
| 45 |                    |                      |                                                                                                                                                                                                                   |       |
| 46 |                    |                      |                                                                                                                                                                                                                   |       |
| 47 | <b>Other</b>       |                      |                                                                                                                                                                                                                   |       |
| 48 | <b>Information</b> |                      |                                                                                                                                                                                                                   |       |
| 49 |                    |                      |                                                                                                                                                                                                                   |       |
| 50 |                    |                      |                                                                                                                                                                                                                   |       |
| 51 | Funding            | <a href="#">#22</a>  | Give the source of funding and the role of the funders for the present study and, if applicable, for the original study on which the present article is based                                                     | 3     |
| 52 |                    |                      |                                                                                                                                                                                                                   |       |
| 53 |                    |                      |                                                                                                                                                                                                                   |       |
| 54 |                    |                      |                                                                                                                                                                                                                   |       |
| 55 |                    |                      |                                                                                                                                                                                                                   |       |

The STROBE checklist is distributed under the terms of the Creative Commons Attribution License CC-BY.

This checklist was completed on 23. October 2021 using <https://www.goodreports.org/>, a tool made by the

[EQUATOR Network](#) in collaboration with [Penelope.ai](#)

For peer review only - <http://bmjopen.bmj.com/site/about/guidelines.xhtml>
